1 **Oligodendrocyte-lineage cell exocytosis and L-type prostaglandin D synthase**  
2 **promote oligodendrocyte development and myelination**

3

4 **Authors**

5 Lin Pan<sup>1</sup>, Amelia Trimarco<sup>2</sup>, Alice J. Zhang<sup>1</sup>, Ko Fujimori<sup>3</sup>, Yoshihiro Urade<sup>4</sup>, Lu O. Sun<sup>5</sup>,  
6 Carla Taveggia<sup>2</sup>, and Ye Zhang<sup>1,6,7,8</sup>

7 **Author affiliations**

8 1. Department of Psychiatry and Biobehavioral Sciences, Intellectual and  
9 Developmental Disabilities Research Center, Semel Institute for Neuroscience and  
10 Human Behavior, David Geffen School of Medicine at the University of California,  
11 Los Angeles (UCLA), CA, USA

12 2. Division of Neuroscience, INSPE, San Raffaele Scientific Institute, Milan, Italy

13 3. Department of Pathobiochemistry, Osaka Medical and Pharmaceutical University,  
14 Osaka, Japan

15 4. Daiichi University of Pharmacy, Fukuoka, Japan

16 5. Department of Molecular Biology, University of Texas Southwestern Medical  
17 Center, Dallas, TX, USA

18 6. Brain Research Institute at UCLA

19 7. Eli and Edythe Broad Center of Regenerative Medicine and Stem Cell Research  
20 at UCLA

21 8. Molecular Biology Institute at UCLA

22 \*Correspondence: [yezhang@ucla.edu](mailto:yezhang@ucla.edu); [taveggia.carla@hsr.it](mailto:taveggia.carla@hsr.it)

23

## 24 **Summary**

25           In the developing central nervous system, oligodendrocyte precursor cells (OPCs)  
26 differentiate into oligodendrocytes, which form myelin around axons. Oligodendrocytes  
27 and myelin are essential for the function of the central nervous system, as evidenced by  
28 the severe neurological symptoms that arise in demyelinating diseases such as multiple  
29 sclerosis and leukodystrophy. Although many cell-intrinsic mechanisms that regulate  
30 oligodendrocyte development and myelination have been reported, it remains unclear  
31 whether interactions among oligodendrocyte-lineage cells (OPCs and oligodendrocytes)  
32 affect oligodendrocyte development and myelination. Here, we show that blocking  
33 vesicle-associated membrane protein (VAMP) 1/2/3-dependent exocytosis from  
34 oligodendrocyte-lineage cells impairs oligodendrocyte development, myelination, and  
35 motor behavior in mice. Adding oligodendrocyte-lineage cell-secreted molecules to  
36 secretion-deficient OPC cultures partially restores the morphological maturation of  
37 oligodendrocytes. Moreover, we identified L-type prostaglandin D synthase as an  
38 oligodendrocyte-lineage cell-secreted protein that promotes oligodendrocyte  
39 development and myelination *in vivo*. These findings reveal a novel autocrine/paracrine  
40 loop model for the regulation of oligodendrocyte and myelin development.

41

## 42 **Keywords**

43 Oligodendrocyte precursor cells, oligodendrocytes, myelin, development, autocrine,  
44 paracrine, exocytosis, secretion, L-type prostaglandin D synthase

45

## 46 **Introduction**

47           In the developing central nervous system (CNS), oligodendrocyte precursor cells  
48 (OPCs) differentiate into oligodendrocytes (Bergles and Richardson, 2016; Hill et al.,  
49 2014; Kang et al., 2010), which form myelin sheaths around axons. Myelin is essential for  
50 the propagation of action potentials and for the metabolism and health of axons  
51 (Fünfschilling et al., 2012; Larson et al., 2018; Mukherjee et al., 2020; Saab et al., 2016;  
52 Schirmer et al., 2018; Simons and Nave, 2016). When oligodendrocytes and myelin are  
53 damaged in demyelinating diseases such as multiple sclerosis (MS) and leukodystrophy,  
54 sensory, motor, and cognitive deficits can ensue (Gruchot et al., 2019; Lubetzki et al.,  
55 2020; Stadelmann et al., 2019). In a broader range of neurological disorders involving  
56 neuronal loss, such as brain/spinal cord injury and stroke, the growth and myelination of  
57 new axons are necessary for neural repair (Wang et al., 2020). Thus, understanding  
58 oligodendrocyte development and myelination is critical for developing treatments for a  
59 broad range of neurological disorders.

60           Over the past several decades, researchers have made great progress in  
61 elucidating the cell-intrinsic regulation of oligodendrocyte development and myelination  
62 (e.g., transcription factors, epigenetic mechanisms, and cell death pathways) (Aggarwal  
63 et al., 2013; Bergles and Richardson, 2016; Budde et al., 2010; Dugas et al., 2010; Elbaz  
64 and Popko, 2019; Elbaz et al., 2018; Emery and Lu, 2015; Emery et al., 2009; Fedder-  
65 Semmes and Appel, 2021; Foerster et al., 2020; Harrington et al., 2010; Herbert and  
66 Monk, 2017; Howng et al., 2010; Koenning et al., 2012; Mitew et al., 2018; Nawaz et al.,  
67 2015; Snaidero et al., 2017; Sun et al., 2018; Wang et al., 2017; Xu et al., 2020; Zhao et  
68 al., 2018; Zuchero et al., 2015), as well as the cell-extrinsic regulation by other cell types  
69 (e.g., neurons (Gibson et al., 2014; Hines et al., 2015; Mayoral et al., 2018; Osso et al.,

70 2021; Redmond et al., 2016; Wake et al., 2011), microglia/macrophages (Butovsky et al.,  
71 2006; Sherafat et al., 2021), and lymphocytes (Dombrowski et al., 2017)). However, it  
72 remains unclear whether interactions among oligodendrocyte-lineage cells (OPCs and  
73 oligodendrocytes) affect oligodendrocyte development and myelination.

74 One of the most abundant proteins secreted by oligodendrocyte-lineage cells is  
75 lipocalin-type prostaglandin D synthase (L-PGDS) (Zhang et al., 2014, 2016).  
76 Oligodendrocytes and meningeal cells are major sources of L-PGDS in the CNS (Urade  
77 et al., 1993; Zhang et al., 2014, 2016). L-PGDS has two functions: as an enzyme and as  
78 a carrier (Urade and Hayaishi, 2000). As an enzyme, L-PGDS converts prostaglandin H2  
79 to prostaglandin D2 (PGD2). PGD2 regulates sleep, pain, and allergic reactions (Eguchi  
80 et al., 1999; Satoh et al., 2006; Urade and Hayaishi, 2011). L-PGDS also binds and  
81 transports lipophilic molecules such as thyroid hormone, retinoic acid, and amyloid- $\beta$   
82 (Urade and Hayaishi, 2000) and promotes Schwann cell myelination in the peripheral  
83 nervous system (Trimarco et al., 2014). Yet, its function in the development of the CNS  
84 is unknown.

85 To determine whether cell-cell interactions within the oligodendrocyte lineage  
86 regulate oligodendrocyte development, we blocked VAMP1/2/3-dependent exocytosis  
87 from oligodendrocyte-lineage cells *in vivo* and found impairment in oligodendrocyte  
88 development, myelination, and motor behavior in mice. Similarly, exocytosis-deficient  
89 OPCs exhibited impaired development *in vitro*. Adding oligodendrocyte-lineage cell-  
90 secreted molecules promoted oligodendrocyte development. These results suggest that  
91 an autocrine/paracrine loop promotes oligodendrocyte development and myelination. We  
92 assessed L-PGDS as a candidate autocrine/paracrine signal and further discovered that

93 oligodendrocyte development and myelination were impaired in L-PGDS-knockout mice.  
94 Moreover, PGD2 partially restored the morphological maturation of exocytosis-deficient  
95 OPCs. Thus, L-PGDS is an oligodendrocyte-lineage cell-secreted protein that promotes  
96 oligodendrocyte development. These results reveal a new autocrine/paracrine loop model  
97 for the regulation of oligodendrocyte development in which VAMP1/2/3-dependent  
98 exocytosis from oligodendrocyte-lineage cells and secreted L-PGDS promote  
99 oligodendrocyte development and myelination.

100

## 101 **Results**

### 102 **Expression of botulinum toxin B in oligodendrocyte-lineage cells *in vivo***

103 If oligodendrocyte-lineage cells use autocrine/paracrine mechanisms to promote  
104 development and myelination, one would predict that (1) blocking secretion from  
105 oligodendrocyte-lineage cells would impair oligodendrocyte development and myelination  
106 and, in turn, that (2) adding oligodendrocyte-lineage cell-secreted molecules might  
107 promote oligodendrocyte development. Membrane fusion relies on soluble N-  
108 ethylmaleimide-sensitive fusion protein attachment protein receptors (SNARE) family  
109 proteins located on vesicles (v-SNAREs) and target membranes (t-SNAREs). Binding of  
110 v-SNAREs and t-SNAREs form intertwined  $\alpha$ -helical bundles that generate force for  
111 membrane fusion (Pobbati et al., 2006). VAMP1/2/3 are v-SNAREs that drive the fusion  
112 of vesicles with the plasma membrane to mediate exocytosis (Chen and Scheller, 2001).  
113 We found that oligodendrocyte-lineage cells express high levels of VAMP2 and VAMP3  
114 and low levels of VAMP1 *in vivo* (Fig. 1A-C) (Zhang et al., 2014, 2016), consistent with  
115 previous reports *in vitro* (Feldmann et al., 2009, 2011; Madison et al., 1999). Botulinum

Figure 1

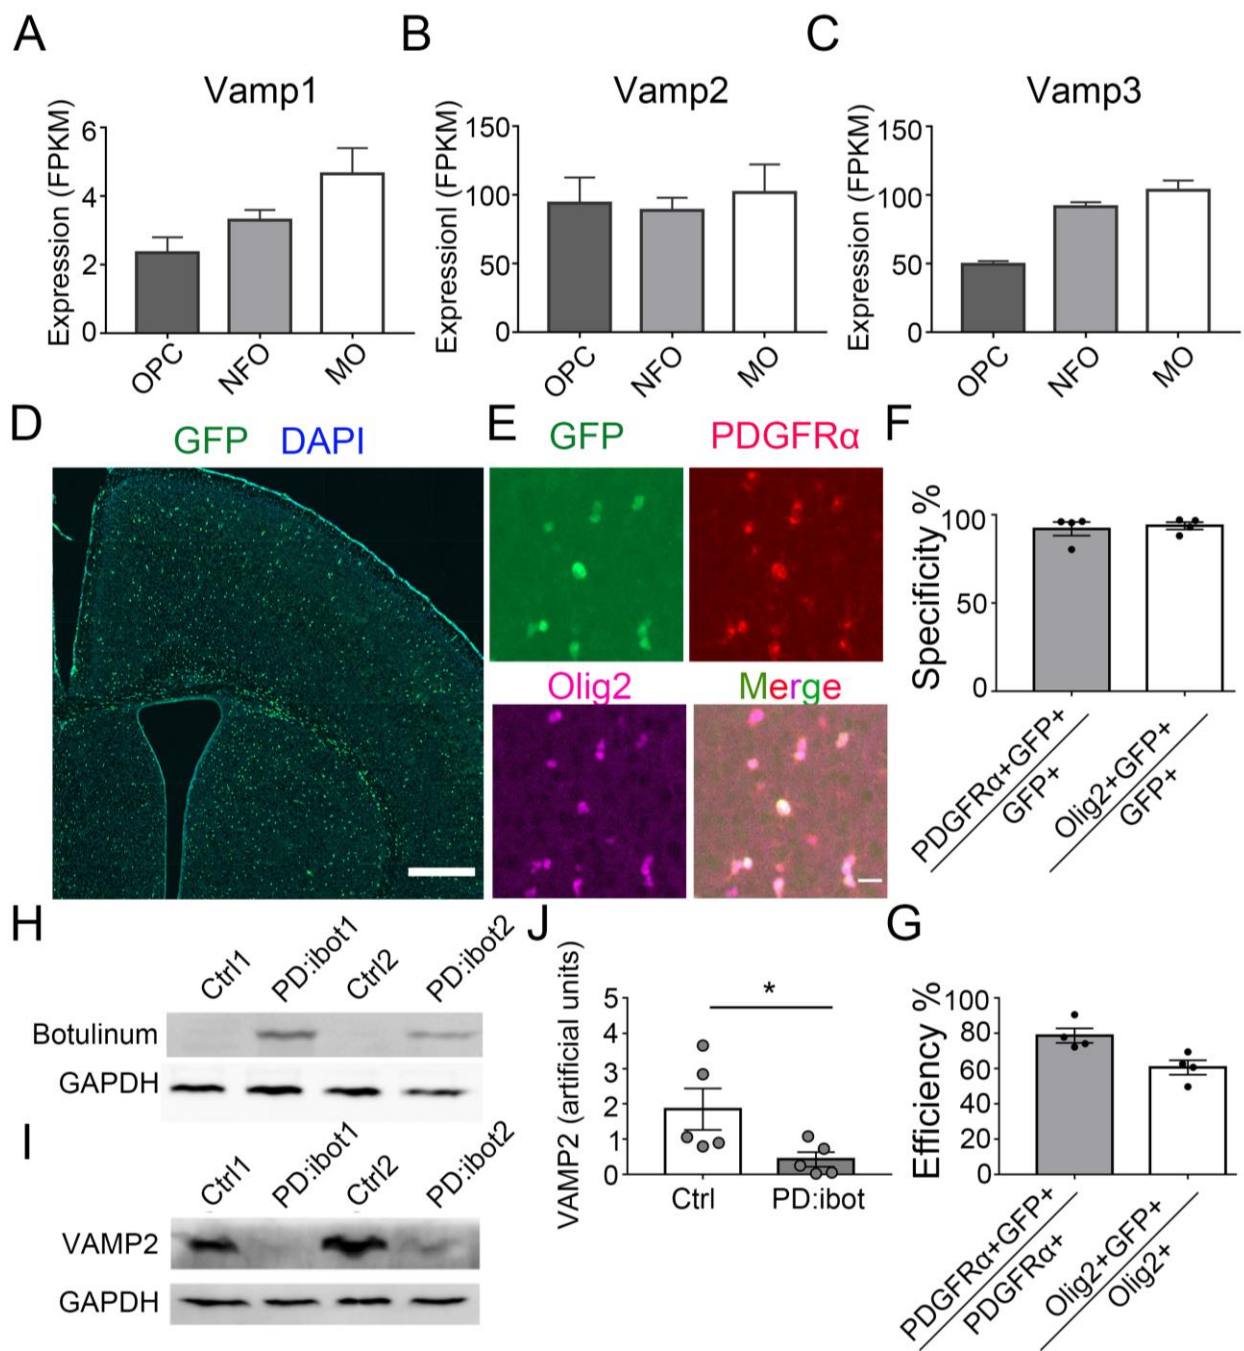

116

117 **Figure 1. VAMP1/2/3 and ibot expression in oligodendrocyte-lineage cells**

118 (A-C) Expression of VAMP1/2/3 by oligodendrocyte-lineage cells determined by RNA-seq  
 119 (Zhang et al., 2014). NFO, newly formed oligodendrocytes. MO, myelinating  
 120 oligodendrocytes.

121 (D) Expression of ibot-GFP in PDGFR $\alpha$ -CreER; ibot (PD:ibot) mice. Scale bar: 500  
 122  $\mu$ m.

123 (E) Colocalization of ibot-GFP with PDGFR $\alpha$  and Olig2 in PD:ibot mice. Scale bar: 20  
124  $\mu$ m.  
125 (F) Specificity of ibot-GFP expression in oligodendrocyte-lineage cells. N=4 mice per  
126 group. 92.1 $\pm$ 3.9% of GFP $^+$  cells were PDGFR $\alpha^+$ ; 93.8 $\pm$ 2.1% of GFP $^+$  cells were Olig2 $^+$ .  
127 (G) Efficiency of ibot-GFP expression in oligodendrocyte-lineage cells. N=4 mice per  
128 group. 78.7 $\pm$ 4.1% of PDGFR $\alpha^+$  cells were GFP $^+$ ; 60.6 $\pm$ 4.1% of Olig2 $^+$  cells were GFP $^+$ .  
129 P8 mice were used in (D-G).  
130 (H) Presence of botulinum toxin B-light chain in oligodendrocyte cultures from 4-  
131 hydroxytamoxifen-injected PD:ibot mice detected by Western blots.  
132 (I) Reduced levels of full-length VAMP2 in oligodendrocyte cultures from 4-  
133 hydroxytamoxifen-injected PD:ibot mice determined by Western blots.  
134 (J) Quantification of VAMP2 immunoblot signal intensity. N=5 mice per group. Paired  
135 two-tailed T-test. \*, p<0.05. \*\*, p<0.01. \*\*\*, p<0.001. NS, not significant.  
136

137 toxin B specifically cleaves VAMP1/2/3 (Yamamoto et al., 2012), but not VAMP4, 5, 7, or  
138 8 (Yamamoto et al., 2012), and inhibits the release of vesicles containing proteins (Somm  
139 et al., 2012) as well as small molecules such as neural transmitters (Poulain et al., 1988).  
140 Of note, botulinum toxin B does not cleave VAMP proteins that are involved in the  
141 vesicular transport between the trans-Golgi network, endosomes, and lysosomes  
142 (Antonin et al., 2000; Hoai et al., 2007; Pols et al., 2013). Similarly, botulinum toxins do  
143 not affect ion channel- or membrane transporter-mediated release of small molecules.

144 To block VAMP1/2/3-dependent exocytosis from oligodendrocyte-lineage cells, we  
145 crossed PDGFR $\alpha$ -CreER transgenic mice, which express Cre recombinase in OPCs  
146 (PDGFR $\alpha^+$ Olig2 $^+$ ) (Kang et al., 2010), with loxP-stop-loxP-botulinum toxin B light chain-  
147 IRES-green fluorescent protein (GFP) (inducible botulinum toxin B, or ibot) transgenic  
148 mice (Slezak et al., 2012), allowing expression of botulinum toxin B-light chain in OPCs  
149 and their progeny. The light chain contains the catalytically active domain of the toxin but  
150 lacks the heavy chain, which allows cell entry (Montal, 2010), thus confining toxin  
151 expression to the targeted cell type. Therefore, the ibot transgenic mice allow for the

152 inhibition of VAMP1/2/3-dependent exocytosis in a cell-type-specific and temporally  
153 controlled manner (Slezak et al., 2012).

154 In our study, we used double-transgenic mice hemizygous for both Cre and ibot  
155 and referred to them as the PD:ibot mice thereafter. To validate our model and test its  
156 recombination efficiency, we injected 0.1 mg of 4-hydroxytamoxifen in each PD:ibot  
157 mouse daily for 2 days between postnatal day 2-4 (P2-4) and examined GFP expression  
158 at P8 and P30. We assessed whether GFP expression is restricted to oligodendrocyte-  
159 lineage cells (specificity) and what proportion of oligodendrocyte-lineage cells express  
160 GFP (efficiency/coverage). At P8, when the vast majority of oligodendrocyte-lineage cells  
161 are undifferentiated OPCs, we detected specific expression of GFP in oligodendrocyte-  
162 lineage cells (Fig. 1D-F). GFP was efficiently expressed by oligodendrocyte-lineage cells  
163 (Fig. 1G). At P30, when substantial numbers of OPCs have differentiated (PDGFR $\alpha$ :  
164 Olig2<sup>+</sup>), we observed a similarly high specificity of GFP expression in oligodendrocyte-  
165 lineage cells (Figure 1-figure supplement 1). These observations are consistent with  
166 previous reports on the specificity and efficiency of the PDGFR $\alpha$ -CreER transgenic line  
167 (Kang et al., 2010). As controls, we used mice with only the Cre transgene or only the  
168 ibot transgene subjected to the same tamoxifen injection scheme. In both control  
169 conditions, we detected very little GFP expression.

170 To directly assess the expression of botulinum toxin B-light chain and the cleavage  
171 of the VAMP proteins in oligodendrocyte-lineage cells from PD:ibot mice, we purified  
172 OPCs from PD:ibot and control mice by immunopanning and allowed them to differentiate  
173 into oligodendrocytes in culture. We performed Western blot analysis of the cultures and  
174 detected botulinum toxin B-light chain in PD:ibot but not in control cells (Fig. 1H).



175 Furthermore, levels of full-length VAMP2 proteins were lower in PD:ibot cells compared  
176 with control cells (Fig. 1I, J). Based on these observations, we conclude that the botulinum  
177 toxin-GFP transgene is specifically and efficiently expressed by oligodendrocyte-lineage  
178 cells in PD:ibot mice.

179 **Blocking VAMP1/2/3-dependent exocytosis from oligodendrocyte-lineage cells**  
180 **impairs oligodendrocyte development, myelination, and motor behavior**

181 In PD:ibot mice, we found that the numbers of differentiated oligodendrocytes  
182 (CC1<sup>+</sup>) were reduced in the cerebral cortex (Fig. 2A, B), whereas the number of OPCs  
183 (PDGFR $\alpha$ <sup>+</sup>) did not change (Fig. 2C, E, F, H). Olig2 labels both OPCs and differentiated  
184 oligodendrocytes, and the densities of Olig2<sup>+</sup> cells in PD:ibot mice are also reduced, likely  
185 due to the reduction in differentiated oligodendrocytes (Fig. 2C, D, F, G). At P8, the vast  
186 majority of PDGFR $\alpha$ -CreER-expressing cells are OPCs (Paukert et al., 2014). Therefore,  
187 it is more likely that blocking exocytosis from OPCs rather than oligodendrocytes affects  
188 oligodendrocyte development during the early postnatal period.

189 We next examined myelin development in PD:ibot mice and found that  
190 immunofluorescence of myelin basic protein (MBP), one of the main components of CNS  
191 myelin, is reduced in PD:ibot mice (Fig. 3A-L). Moreover, many MBP<sup>+</sup> ibot-GFP-  
192 expressing cells exhibit round cell morphology whereas MBP<sup>+</sup>GFP<sup>-</sup> control cells form  
193 elongated myelin internodes along axon tracks (Fig. 3M). Transmission electron  
194 microscopy allows for the assessment of myelin structure at a high resolution. Thus, to  
195 further examine myelination in PD:ibot mice, we performed transmission electron

196 microscopy imaging and found a reduction in the percentage of myelinated axons (Fig.

Figure 2

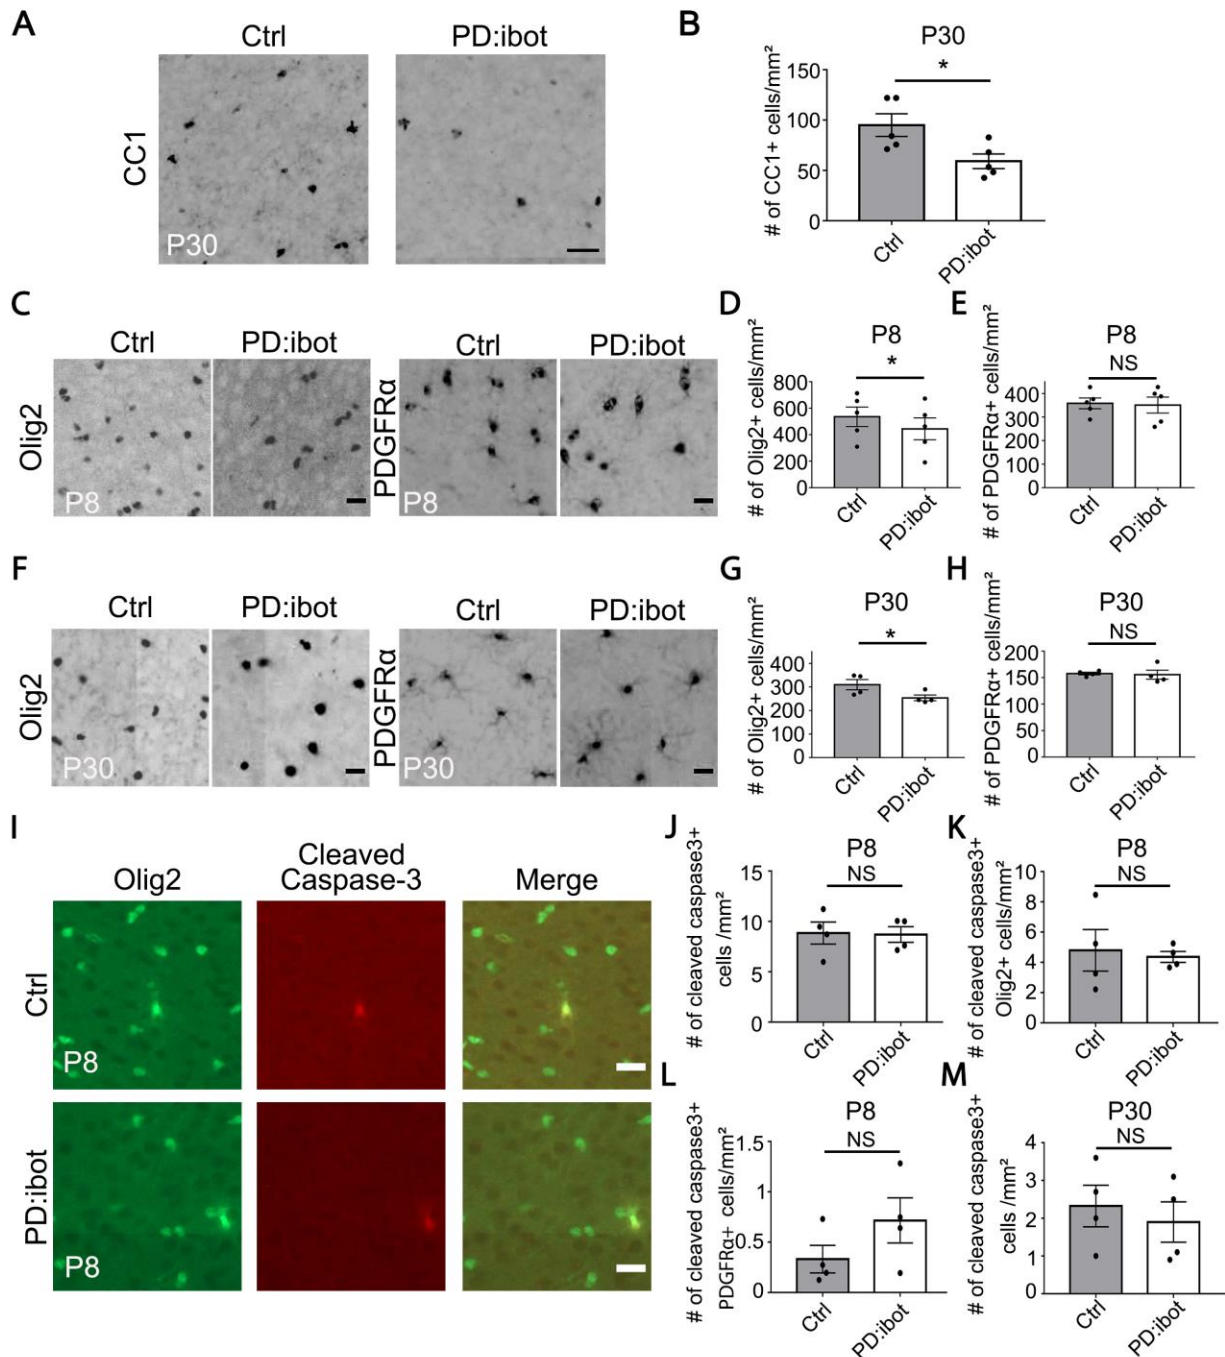

197

198 **Figure 2. Reduction of CC1+ and Olig2+ oligodendrocytes in PD:ibot mic**

199 (A) Differentiated oligodendrocytes labeled by CC1 in the cerebral cortex of PD:ibot and  
200 control mice at P30. Scale bar: 50 μm.

201 (B) Quantification of the density of CC1<sup>+</sup> differentiated oligodendrocytes in the cerebral  
202 cortex of PD:ibot and control mice at P30. N=5 mice per group. Paired two-tailed T-test.  
203 CC1<sup>+</sup> cells/mm<sup>2</sup>: 95.04±11.22 in control and 59.04±7.28 in PD:ibot, p=0.049.  
204 (C, F) Olig2<sup>+</sup> oligodendrocyte-lineage cells and PDGFR $\alpha$ <sup>+</sup> OPCs in the cerebral cortex of  
205 PD:ibot and control mice at P8 (C) and P30 (F). Scale bars: 20  $\mu$ m.  
206 (D, E, G, H) Quantification of the density of Olig2<sup>+</sup> and PDGFR $\alpha$ <sup>+</sup> cells in the cerebral  
207 cortex of PD:ibot and control mice at P8 and P30. N=5 mice per group at P8. N=4 mice  
208 per group at P30. Paired two-tailed T-test. Olig2<sup>+</sup> cells/mm<sup>2</sup>: 535.6±73.6 in control and  
209 444.4±82.9 in PD:ibot, p=0.040 at P8; 309.9±21.7 in control and 253.8±12.2 in PD:ibot,  
210 p=0.048 at P30. PDGFR $\alpha$ <sup>+</sup> cells/mm<sup>2</sup>: 358.4±22.8 in control and 350.9±34.0 in PD:ibot,  
211 p=0.74 at P8; 157.8±2.6 in control and 155.6±8.5 in PD:ibot, p=0.85 at P30.  
212 (I) Examples of apoptotic oligodendrocyte-lineage cells labeled by cleaved caspase-3 in  
213 the cerebral cortex at P8. Scale bar: 20  $\mu$ m.  
214 (J-M) Quantification of the density of caspase3<sup>+</sup> cells in the cerebral cortex of PD:ibot and  
215 control mice. N=4 mice per group. Paired two-tailed T-test. P8: Caspase3<sup>+</sup> cells/mm<sup>2</sup>:  
216 8.9±1.1 in control and 8.7±0.8 in PD:ibot; p=0.93; Caspase3<sup>+</sup>PDGFR $\alpha$ <sup>+</sup> cells/mm<sup>2</sup>:  
217 0.33±0.14 in control and 0.72±0.22 in PD:ibot; p=0.33; Caspase3<sup>+</sup>Olig2<sup>+</sup> cells/mm<sup>2</sup>:  
218 4.8±1.4 in control and 4.4±0.4 in PD:ibot; p=0.74. P30: Caspase3<sup>+</sup> cells/mm<sup>2</sup>: 2.3±1.1 in  
219 control and 1.9±1.1 in PD:ibot; p=0.53.  
220

221 3N, O) and reduced myelin thickness in PD:ibot mice (g-ratio: axon diameter divided by  
222 the diameter of axon + myelin; Fig. 3P, Q).

223 To determine whether the reduction of oligodendrocytes in PD:ibot mice is caused  
224 by cell death, we performed immunostaining with an antibody against activated caspase-  
225 3, which labels apoptotic cells. We observed no difference in the total apoptotic cells  
226 (caspase-3<sup>+</sup>), apoptotic OPCs (caspase-3<sup>+</sup>PDGFR $\alpha$ <sup>+</sup>), or apoptotic oligodendrocyte-  
227 lineage cells (caspase-3<sup>+</sup>Olig2<sup>+</sup>) between PD:ibot and control mice in the cerebral cortex  
228 (Fig. 2I-M).

229 To investigate whether the expression of botulinum toxin B-light chain affects  
230 oligodendrocyte development and myelination in non-cell-type-specific manners, we  
231 blocked exocytosis from astrocytes or endothelial cells by crossing ibot transgenic mouse  
232 with mGFAP-Cre (line 77.6) and Tie2-Cre strains, respectively. We found astrocyte- and

### Figure 3

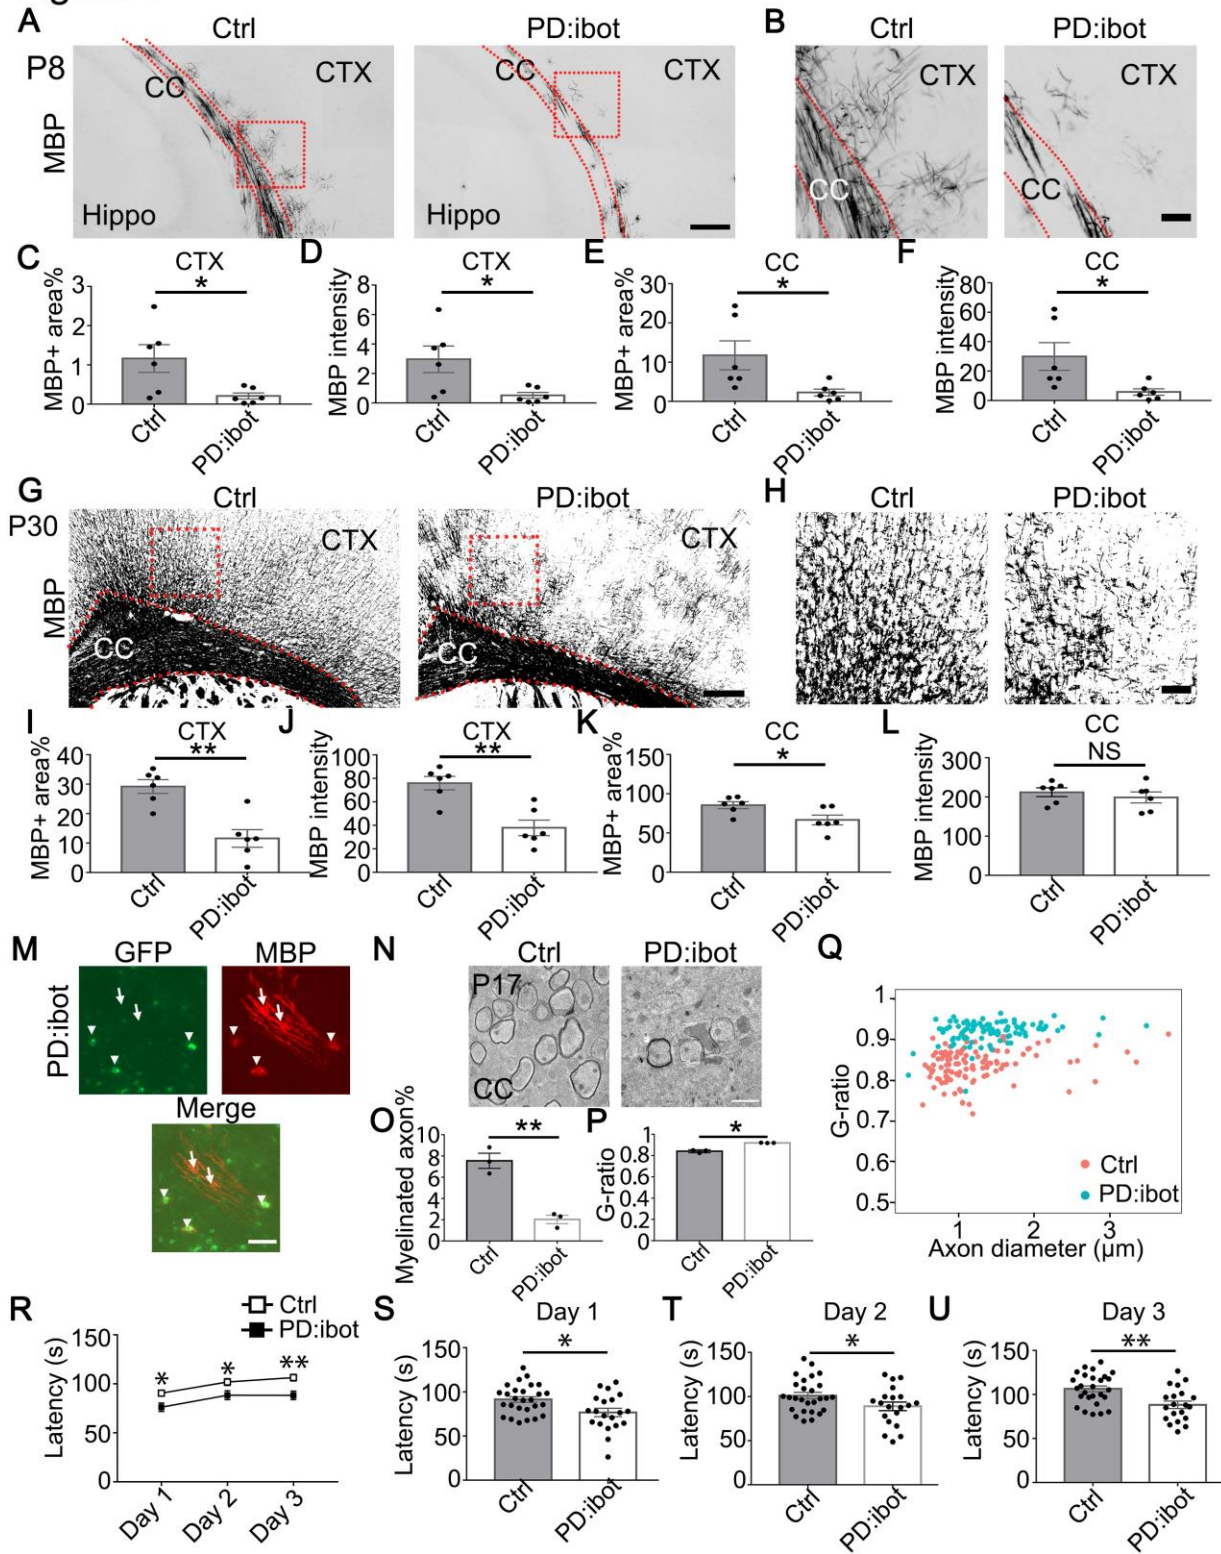

233

234 **Figure 3. Defective myelination and motor behavior in PD:ibot mice**

235 (A, B) MBP immunofluorescence at P8 in PD:ibot and control brains. Dashed lines  
236 delineate corpus callosum. CTX, cerebral cortex. CC, corpus callosum. Hippo,  
237 hippocampus. Boxed areas in (A) are enlarged and shown in (B). Scale bars: 200  $\mu\text{m}$  in  
238 (A), 50  $\mu\text{m}$  in (B).

239 (C-F) Quantification of MBP<sup>+</sup> area and mean MBP fluorescence intensity in the cerebral  
240 cortex (C, D) and the corpus callosum (E, F) at P8. N=6 mice per group. Paired two-tailed  
241 T-test.

242 (G, H) MBP immunofluorescence at P30 in PD:ibot and control brains. Dashed lines  
243 delineate corpus callosum. Boxed areas in (G) are enlarged and shown in (H). Scale bars:  
244 200  $\mu\text{m}$  in (G), 50  $\mu\text{m}$  in (H).

245 (I-L) Quantification of MBP<sup>+</sup> area and mean MBP fluorescence intensity in the cerebral  
246 cortex (I, J) and corpus callosum (K, L) at P30. N=6 mice per group. Paired two-tailed T-  
247 test.

248 (M) The morphology of ibot-GFP<sup>+</sup> cells and GFP<sup>-</sup> control cells labeled by MBP  
249 immunofluorescence. A region in the cerebral cortex from a P8 PD:ibot mouse is shown.  
250 The arrowheads point to ibot-GFP<sup>+</sup> cells and the arrows point to GFP<sup>-</sup> control cells. Scale  
251 bar: 50  $\mu\text{m}$ .

252 (N) Transmission electron microscopy images of the corpus callosum at P17. Scale bar:  
253 1  $\mu\text{m}$ .

254 (O, P) Quantification of the percentage of myelinated axons and G-ratio (axon diameter  
255 divided by the diameter of myelin + axon) from the transmission electron microscopy  
256 images of the corpus callosum at P17. N=3 mice per group. Paired two-tailed T-test.  
257 Myelinated axons %:  $7.6\pm 0.7$  in control and  $2.0\pm 0.4$  in PD:ibot,  $p=0.0048$ . G-ratio:  
258  $0.84\pm 0.009$  in control and  $0.92\pm 0.0009$  in PD:ibot;  $p=0.012$ .

259 (Q) G-ratio as a function of axon diameter in the corpus callosum at P17. N=3 mice per  
260 group.

261 (R) Latency to fall from an accelerating rotarod (seconds). Each mouse was tested three  
262 times per day for three consecutive days. The average latency to fall of the three trials of  
263 each mouse was recorded for each day. No significant sex differences were detected.  
264 Unpaired two-tailed T-test was performed with Benjamini, Krieger, and Yekutieli's false  
265 discovery rate (FDR) method to correct for multiple comparisons. \*, FDR <0.05. \*\*,  
266 FDR<0.01.

267 (S-U) Latency to fall on each testing day. Day 1: PD:ibot:  $76.7\pm 4.7$  seconds, control:  
268  $91.4\pm 3.2$  seconds,  $p=0.015$ ; day 2: PD:ibot:  $88.9\pm 4.9$  seconds, control:  $101.1\pm 3.7$   
269 seconds,  $p=0.033$ ; day 3: PD:ibot:  $88.4\pm 4.3$  seconds, control:  $106.4\pm 3.3$  seconds,  
270  $p=0.0051$ . N=27 mice for control and 20 mice for PD:ibot.

271  
272 endothelial cell-specific expression of ibot-GFP in these mice but did not detect any  
273 obvious changes in oligodendrocyte density or myelin proteins (data not shown). These  
274 observations suggest that botulinum toxin B-light chain peptides have specific effects on  
275 the targeted cell types.

276 To examine the functional consequences of blocking VAMP1/2/3-dependent  
277 exocytosis from oligodendrocyte-lineage cells, we assessed the motor behavior of  
278 PD:ibot and littermate control mice using the rotarod test. We placed mice on a gradually  
279 accelerating rotarod and recorded the time each mouse stayed on the rotarod. We found  
280 that PD:ibot mice stayed on the rotarod for significantly shorter amounts of time than  
281 littermate control mice on all three days of testing (Fig. 3R-U). Therefore, blocking  
282 VAMP1/2/3-dependent exocytosis from oligodendrocyte-lineage cells led to deficits in  
283 neural circuit function.

284 **Blocking VAMP1/2/3-dependent exocytosis from oligodendrocyte-lineage cells**  
285 **impairs oligodendrocyte development *in vitro***

286 VAMP1/2/3-dependent exocytosis from oligodendrocyte-lineage cells may directly  
287 affect oligodendrocyte development or change the attributes of other cell types, and, in  
288 turn, indirectly affect oligodendrocytes. For example, OPC-secreted molecules may affect  
289 axonal growth, and subsequently axonal signals may affect oligodendrocytes indirectly.  
290 Therefore, we next employed purified OPC and oligodendrocyte cultures to determine  
291 whether secreted molecules have direct autocrine/paracrine roles in oligodendrocyte-  
292 lineage cells in the absence of other cell types.

293 We performed immunopanning to purify OPCs from P7 PD:ibot and control mice  
294 injected with 4-hydroxytamoxifen as described above. We cultured the OPCs for two days  
295 in the proliferation medium and then switched to the differentiation medium and cultured  
296 them for another seven days. To assess oligodendrocyte differentiation and maturation,  
297 we assessed the levels of MBP protein, a marker for differentiated oligodendrocytes, and  
298 detected lower MBP levels in PD:ibot cells compared with controls (Fig. 4B, C).

Figure 4

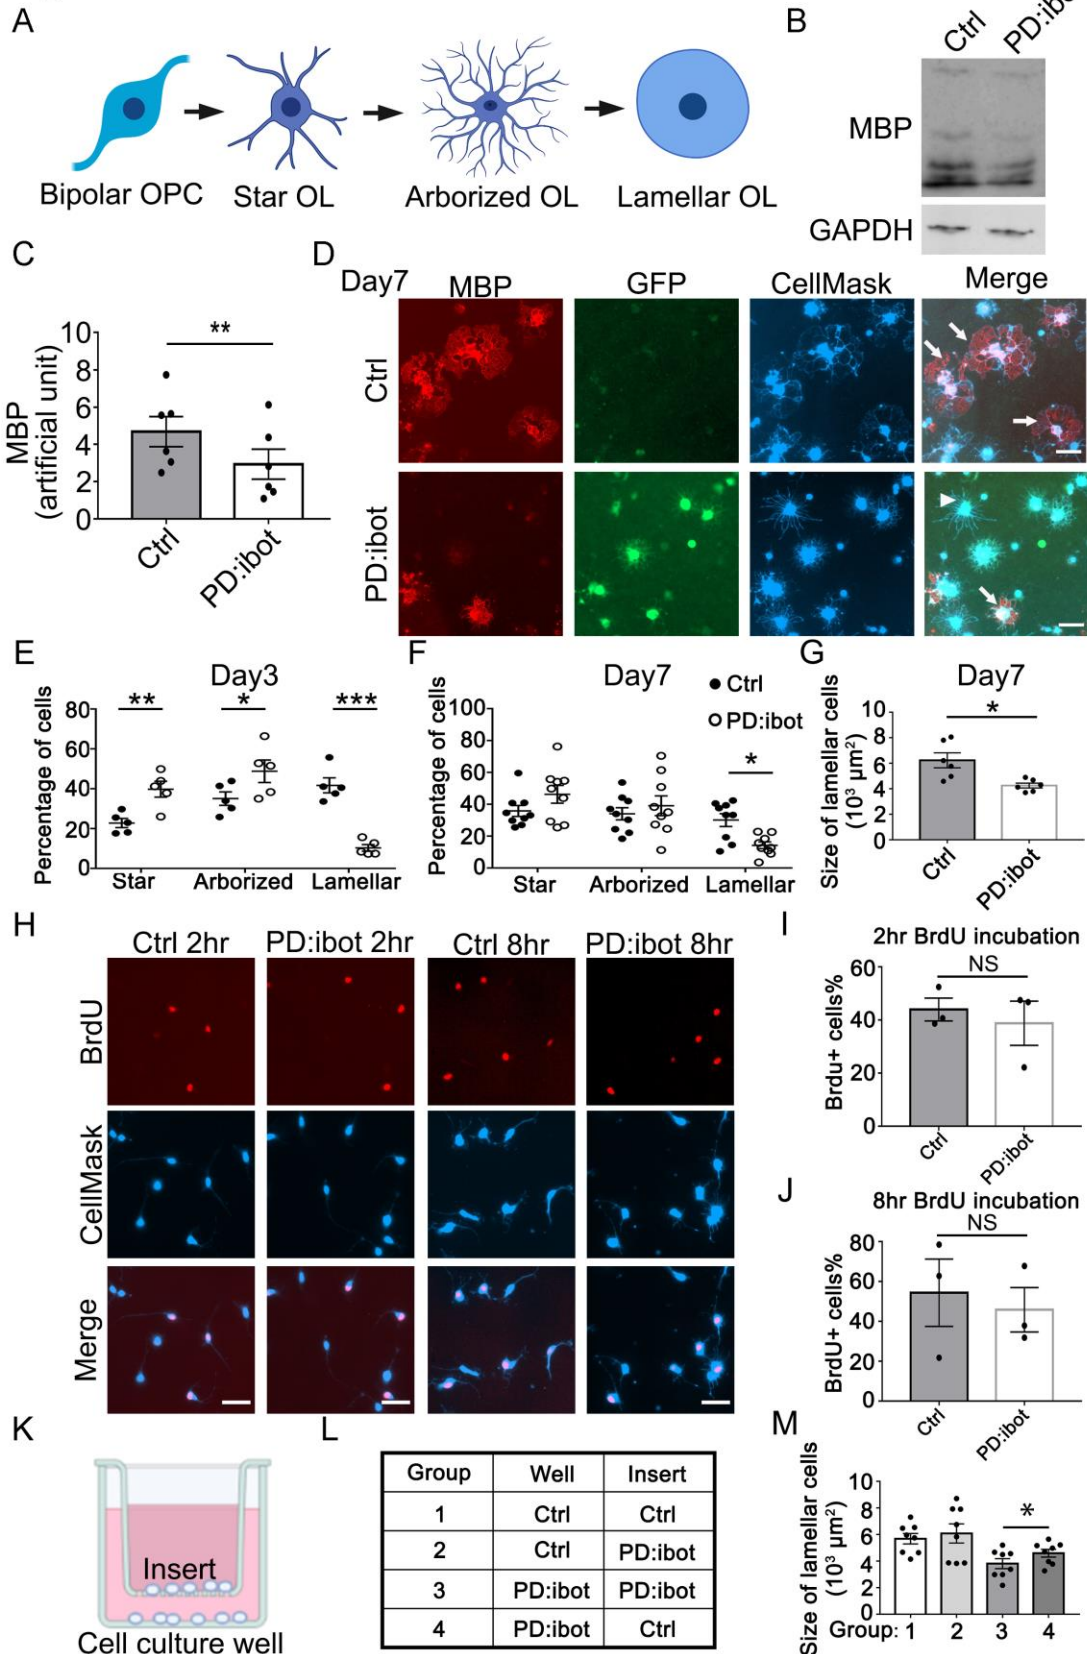

300 **Figure 4. *In vitro* development defect of oligodendrocytes purified from PD:ibot**  
301 **mice**

302 (A) A diagram of the morphological changes during oligodendrocyte differentiation *in*  
303 *vitro*. OPCs exhibit a bipolar morphology. Differentiating oligodendrocytes first grow  
304 multiple branches (star-shaped and arborized) and then develop myelin-like membrane  
305 extension and exhibit a lamellar morphology.

306 (B) Western blot for MBP in oligodendrocyte cultures after 7 days of differentiation.

307 (C) Quantification of MBP proteins from Western blot. N=6 mice per group. Paired two-  
308 tailed T-test.

309 (D) Oligodendrocyte cultures after 7 days of differentiation. Red, MBP. Green,  
310 ibot:GFP. Blue, CellMask, which labels all cells. Arrows point to examples of lamellar cells  
311 and an arrowhead points to an example of a star-shaped oligodendrocyte. Scale bars: 50  
312  $\mu\text{m}$ .

313 (E-F) Quantification of the percentage of cells at the star-shaped, arborized, and lamellar  
314 stages after 3 (E) and 7 (F) days of differentiation. Filled circles, control. Open circles,  
315 PD:ibot. N=5 mice per group on day 3 and N=9 mice per group on day 7. Unpaired two-  
316 tailed T-test with the Holm-Sidak multiple comparison adjustment.

317 (G) Quantification of the size of lamellar cells in oligodendrocyte cultures obtained from  
318 PD:ibot and littermate control mice after 7 days of differentiation. N=6 cultures from 4  
319 mice per group. Paired two-tailed T-test.  $6,237 \pm 587.5 \mu\text{m}^2$  in control and  $4,253 \pm 193.7$   
320  $\mu\text{m}^2$  in PD:ibot;  $p=0.016$ .

321 (H) Proliferation of OPCs from PD:ibot and littermate control mice *in vitro*. OPC cultures  
322 were fixed and stained 2 and 8 hours after the addition of BrdU. Hr, hour. Scale bars: 50  
323  $\mu\text{m}$ .

324 (I, J) Quantification of the percentage of BrdU<sup>+</sup> cells in OPC cultures obtained from  
325 PD:ibot and littermate control mice at 2 (I) and 8 (J) hours after addition of BrdU. N=3  
326 mice per group. Paired two-tailed T-test. 2 hour BrdU incubation, BrdU<sup>+</sup> cells%:  $44.0 \pm 4.3$   
327 in control and  $38.8 \pm 8.3$  in PD:ibot;  $p=0.51$ ; 8 hour BrdU incubation, BrdU<sup>+</sup> cells%:  
328  $54.4 \pm 16.9$  in control and  $45.9 \pm 11.1$  in PD:ibot;  $p=0.49$ .

329 (K) Diagram of cocultures of cells separated by a porous insert with 1  $\mu\text{m}$  pore size.

330 (L) The genotype of cells on the inserts and wells in each group. The differentiation of the  
331 cells on the bottom of the wells was examined. N=8 cultures from 5 mice per condition.

332 (M) Quantification of the size of lamellar cells. Group 3 vs. group 4:  $p=0.016$ . Group 1 vs.  
333 group 3:  $p=0.0002$ . Group 2 vs. group 3:  $p=0.0051$ . Group 1 vs. group 4:  $p=0.0068$ . All  
334 other pairs of conditions are not significantly different. One-way ANOVA with Tukey's test  
335 for multiple comparisons. Size of lamellar cells: group 1:  $5,691 \pm 391 \mu\text{m}^2$ ; group 2:  
336  $6,087 \pm 720.7 \mu\text{m}^2$ ; group 3:  $3,810 \pm 376 \mu\text{m}^2$ ; group 4:  $4,594 \pm 293.3 \mu\text{m}^2$ .

337

338 Additionally, we assessed the morphological maturation of oligodendrocytes *in*  
339 *vitro* (Fig. 4C-G). OPCs are initially bipolar, and as they differentiate, they grow a few  
340 branches to become star-like. The cells next grow more branches to become arborized  
341 and then extend myelin-sheath-like flat membranous structures, acquiring a "lamellar"



342 morphology (Fig. 4A) (Zuchero et al., 2015) (also referred to as a “fried egg” or “pancake”  
343 morphology). We used the CellMask dye that labels plasma membrane to analyze the  
344 morphological maturation of oligodendrocytes. At day 3 of differentiation, we found that a  
345 larger proportion of PD:ibot cells than control cells are at the early “star” stage whereas a  
346 smaller proportion of PD:ibot cells than control cells have proceeded to the late “lamellar”  
347 stage (Fig. 4E). At day 7 of differentiation, more PD:ibot cells have proceeded from the  
348 “star” to the “arborized” stage compared with day 3, but the percentage of cells that have  
349 proceeded to the late “lamellar” stage remains lower in PD:ibot than in control cultures  
350 (Fig. 4D, F). We next quantified the size of lamellar cells, which have large sheaths of  
351 myelin-like membrane. Interestingly, we found that lamellar cells from PD:ibot mice are  
352 significantly smaller than those from control mice (Fig. 4D, G). Together, these  
353 observations suggest that VAMP1/2/3-dependent exocytosis is required for the  
354 morphological maturation of oligodendrocytes and that oligodendrocyte-lineage cell-  
355 secreted molecules act directly on cells within the oligodendrocyte lineage to promote  
356 their development.

357 We next examined whether blocking VAMP1/2/3-dependent exocytosis affects  
358 OPC proliferation using bromodeoxyuridine (BrdU) pulse-chase experiments and did not  
359 observe any differences between cultured OPCs from PD:ibot and littermate control mice  
360 (Fig. 4H-J).

### 361 **Oligodendrocyte-lineage cell-secreted molecules partially restore oligodendrocyte** 362 **morphological maturation in secretion-deficient cells**

363 Having established the necessity of VAMP1/2/3-dependent exocytosis from  
364 oligodendrocyte-lineage cells for oligodendrocyte development and myelination, we next

365 assessed whether adding oligodendrocyte-lineage cell-secreted molecules could restore  
366 differentiation in VAMP1/2/3-dependent exocytosis-deficient OPCs. We prepared co-  
367 cultures of OPCs separated by inserts with 1  $\mu\text{m}$ -diameter pores to allow for the diffusion  
368 of secreted molecules (Fig. 4K). We plated PD:ibot and control cells on inserts and on the  
369 bottom of culture wells in four combinations: (1) control-inserts-control-wells; (2) PD:ibot-  
370 inserts-control-wells; (3) PD:ibot-inserts-PD:ibot-wells; and (4) control-inserts-PD:ibot-  
371 wells (Fig. 4L) and examined oligodendrocyte morphological differentiation on the bottom  
372 of culture wells by quantifying lamellar cells as described above. Comparing group 3 vs.  
373 group 4, we found that adding secreted molecules from control cells on inserts partially  
374 rescued the size of lamellar cells of PD:ibot cells on the bottom of culture wells (Fig. 4M),  
375 lending further support to the hypothesis that oligodendrocyte-lineage cell-secreted  
376 molecules promote oligodendrocyte development.

### 377 **PD:ibot mice exhibit changes in the transcriptomes of OPCs and oligodendrocytes**

378 We next aimed to uncover the molecular changes in OPCs and oligodendrocytes  
379 in PD:ibot mice, and to identify candidate secreted molecules that regulate  
380 oligodendrocyte differentiation and myelination. We performed immunopanning to purify  
381 OPCs and oligodendrocytes from the brains of P17 PD:ibot and littermate control mice  
382 and performed RNA-sequencing (RNA-seq). We detected broad and robust gene  
383 expression changes in oligodendrocytes, and moderate changes in OPCs (Fig. 5A, B,  
384 Supplementary Table 1, 2), demonstrating that VAMP1/2/3-dependent exocytosis from  
385 oligodendrocyte-lineage cells is critical for establishing and/or maintaining the normal  
386 molecular attributes of oligodendrocytes and OPCs. Notably, the expression of signature  
387 genes of differentiated oligodendrocytes such as *Plp1*, *Mbp*, *Aspa*, and *Mobp* were

Figure 5

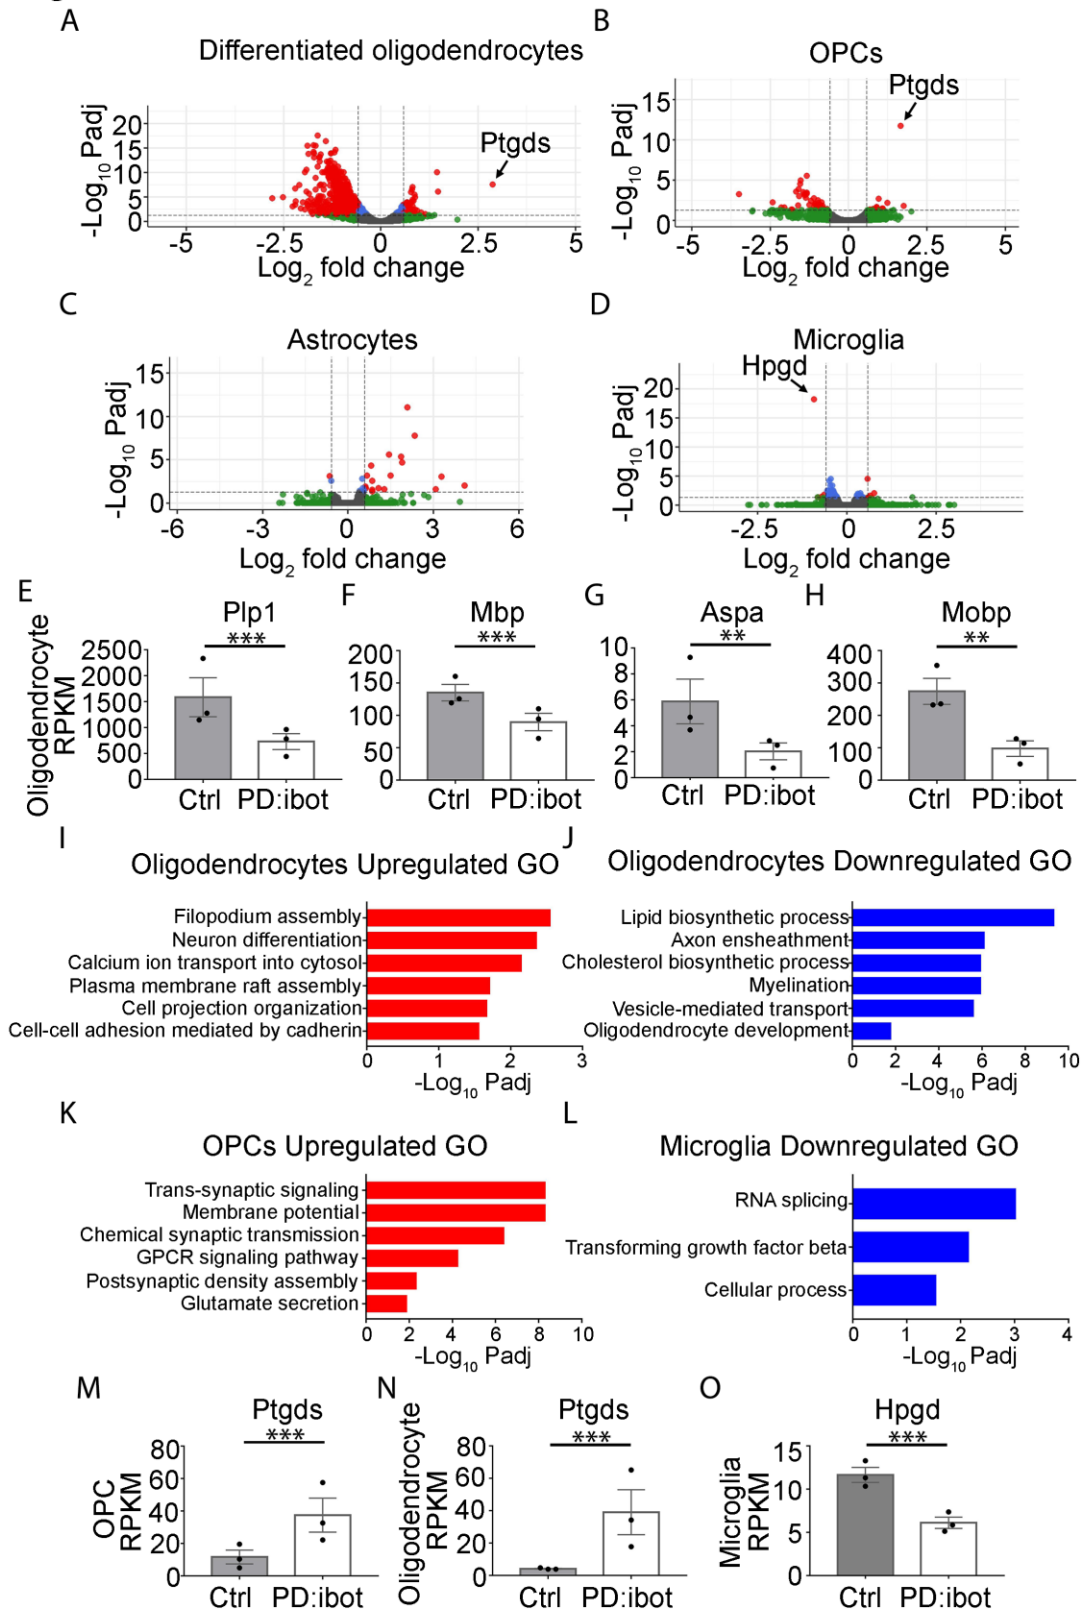

389 **Figure 5. Transcriptome changes of purified glial cells from PD:ibot mice**  
390 (A-D) Differentiated oligodendrocytes, OPCs, astrocytes, and microglia were purified by  
391 immunopanning from whole brains of P17 PD:ibot and littermate control mice. Gene  
392 expression was determined by RNA-seq. Genes exhibiting significant changes (P-value  
393 adjusted for multiple comparisons,  $P_{adj} < 0.05$ , fold change  $> 1.5$ ) are shown in red.  
394 (E-H) Examples of mature oligodendrocyte marker gene expression by oligodendrocytes  
395 purified from PD:ibot and control mice at P17.  
396 (I-L) Examples of GO terms associated with genes upregulated in oligodendrocytes (I),  
397 downregulated in oligodendrocytes (J), upregulated in OPCs (K), and downregulated in  
398 microglia (L). There are no GO terms significantly associated with genes downregulated  
399 in OPCs or upregulated in microglia.  
400 (M, N) Expression of *Ptgds* by OPCs and oligodendrocytes purified from PD:ibot and  
401 control mice at P17.  
402 (O) Expression of *Hpgd* by microglia purified from PD:ibot and control mice at P17. (E-H,  
403 M-O) Expression is shown in RPKM. N=3 mice per group. Significance is determined by  
404 DESeq2.  
405

406 significantly reduced in oligodendrocytes purified from PD:ibot mice compared with  
407 controls (Fig. 5E-H, Supplementary Table 1, 2). This result was not secondary to a  
408 reduction in oligodendrocyte density, as we loaded a similar amount of cDNA libraries  
409 from PD:ibot and control oligodendrocytes for sequencing, and processed all sequencing  
410 data with the same pipeline. Therefore, VAMP1/2/3-dependent exocytosis from  
411 oligodendrocyte-lineage cells is critical for the expression of mature oligodendrocyte  
412 genes. We next performed gene ontology (GO) analysis to reveal the molecular pathways  
413 and cellular processes altered in each type of glial cell in PD:ibot mice (Fig. 5I-L,  
414 Supplementary Table 3). Genes associated with the filopodium assembly, calcium ion  
415 transport, and plasma membrane raft assembly pathways were increased and genes  
416 associated with lipid biosynthetic process, axon ensheathment, and myelination  
417 pathways were reduced in oligodendrocytes in PD:ibot mice. Genes associated with the  
418 trans-synaptic signaling, chemical synaptic transmission, and GPCR signaling pathways  
419 were increased in OPCs in PD:ibot mice. To assess whether oligodendrocyte-lineage cell

420 exocytosis affects other glial cell types, such as astrocytes and microglia, we also purified  
421 these cells by immunopanning and performed RNA-seq. We observed moderate changes  
422 in astrocytes and microglia (Fig. 5C, D). For example, genes associated with  
423 phagocytosis, such as *CD68* and *C1qc*, were increased in microglia from PD:ibot mice  
424 (Supplementary Table 2), suggesting the importance of oligodendrocyte-secreted  
425 molecules in oligodendrocyte-microglial interactions.

426 We next sought to uncover the identity of the secreted molecules that promote  
427 oligodendrocyte and myelin development. If the signal is a protein, we posit that (1)  
428 oligodendrocyte-lineage cells must highly express the gene encoding the protein; (2) the  
429 expression pattern must be conserved in evolution in humans and mice; and (3) blocking  
430 its secretion should activate compensatory mechanisms to increase the expression of this  
431 gene and/or change the expression of related genes in the same pathway. We previously  
432 purified oligodendrocyte-lineage cells by immunopanning from human and mouse brains  
433 and performed RNA-seq (Zhang et al., 2014, 2016). We mined the data and generated a  
434 list of candidate genes meeting criteria 1 and 2. To identify genes meeting criterion 3, we  
435 analyzed the RNA-seq data from purified OPCs and oligodendrocytes from PD:ibot and  
436 littermate control mice. We found that the gene *Ptgds* (encoding the L-PGDS protein,  
437 which converts prostaglandin H<sub>2</sub> to PGD<sub>2</sub> (Urade and Hayaishi, 2000)) is highly  
438 upregulated specifically in OPCs and oligodendrocytes of PD:ibot mice (Fig. 5A, B, M, N),  
439 but not in microglia or astrocytes. *Ptgds* is one of the most abundant genes encoding a  
440 secreted protein expressed by oligodendrocyte-lineage cells in both humans and mice  
441 (Zhang et al., 2014, 2016). Its expression increases during development (Kang et al.,  
442 2011), as oligodendrocyte development and myelination occur, and is reduced in OPCs

443 in multiple sclerosis patients (Jäkel et al., 2019). L-PGDS is also important for Schwann  
444 cell myelination in the peripheral nervous system (Trimarco et al., 2014). Yet, its function  
445 in the development of the CNS is unknown.

446 Of note, in microglia from PD:ibot mice, we found significant downregulation of the  
447 gene *Hpgd*, which encodes a PGD2 degradation enzyme (Conner et al., 2001) (Fig. 5D,  
448 O). The changes in *Ptgds* and *Hpgd* expression were far more significant and robust than  
449 the remaining differential gene expression in PD:ibot mice (Fig. 5A, B, D). L-PGDS  
450 synthesizes PGD2 extracellularly (Urade and Hayaishi, 2000) whereas *Hpgd* inactivates  
451 PGD2 (Conner et al., 2001). We hypothesize that an increase in L-PGDS combined with  
452 a decrease in *Hpgd* could lead to augmented extracellular PGD2. Blocking L-PGDS  
453 secretion and thus extracellular PGD2 synthesis could activate compensatory  
454 mechanisms to boost PGD2 by increasing the mRNA of L-PGDS (*Ptgds*) and decreasing  
455 the mRNA of *Hpgd*, which is consistent with criterion 3. Therefore, we next evaluated L-  
456 PGDS as a candidate molecule for the regulation of oligodendrocyte development.

457

### 458 **Blocking L-PGDS leads to oligodendrocyte development defects *in vitro***

459 We performed Western blot analyses to assess L-PGDS secretion by botulinum  
460 toxin B-expressing OPCs/oligodendrocytes in culture. We detected an increase in  
461 intracellular L-PGDS in OPC/oligodendrocyte cultures from PD:ibot mice compared with  
462 controls (Fig. 6A), consistent with the increase in *Ptgds* mRNA determined by RNA-seq  
463 (Fig. 5A, B, M, N). Secreted L-PGDS, however, is lower in PD:ibot compared with control  
464 cultures (Fig. 6A-C), suggesting that botulinum toxin B inhibits L-PGDS secretion. L-  
465 PGDS secretion is not completely eliminated, most likely because not all cells in the

## Figure 6

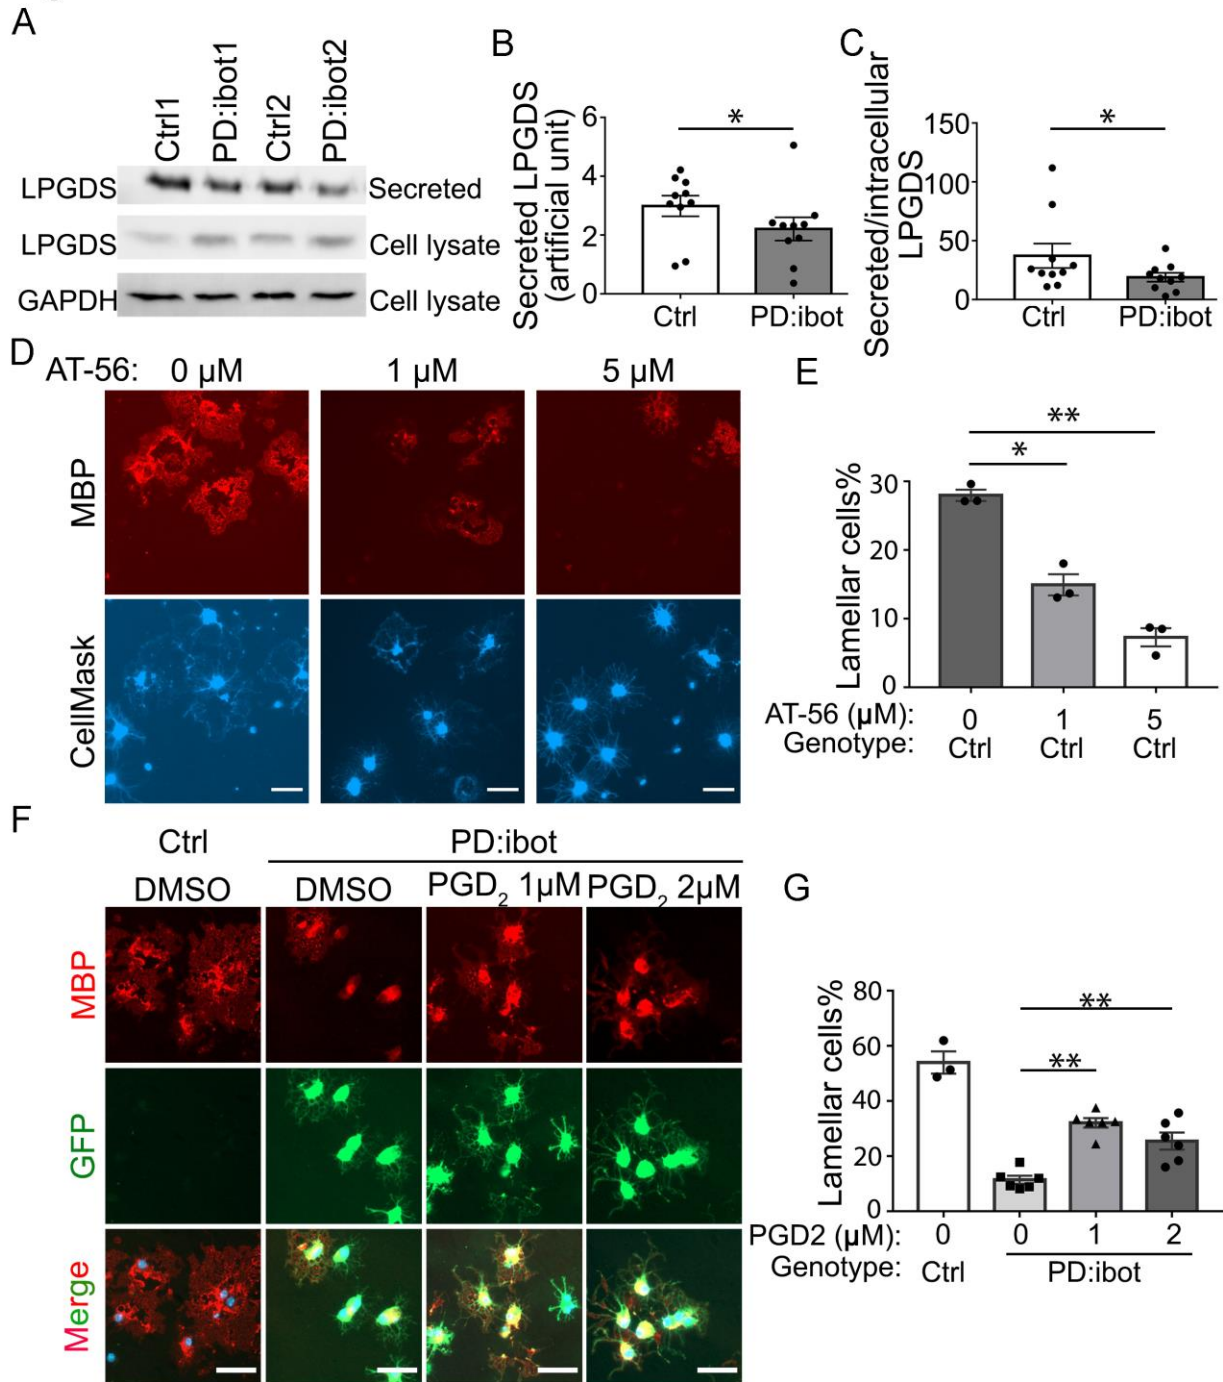

466

467 **Figure 6. The effect of LPGDS inhibitor, AT-56, and PGD2 on oligodendrocyte**  
 468 **development *in vitro***

469 (A) Immunoblot of secreted and intracellular L-PGDS protein from oligodendrocyte  
 470 cultures from PD:ibot and littermate control mice.

471 (B) Quantification of the immunoblot signal intensity of secreted L-PGDS. N=10 mice

472 per group. Paired two-tailed T-test.

473 (C) Quantification of the ratio of secreted and intracellular L-PGDS. N=10 mice per  
474 group. Paired two-tailed T-test.

475 (D) Oligodendrocyte cultures from wild-type mice after 7 days of differentiation in the  
476 presence and absence of the L-PGDS inhibitor AT-56. Red: MBP immunofluorescence.  
477 Blue: CellMask, which labels all cells. Scale bars: 40  $\mu$ m.

478 (E) Quantification of cells with lamellar morphology. One-way ANOVA with Dunnett's test  
479 for multiple comparison correction. N=3 cultures from 3 mice per group. Lamellar cells%:  
480 DMSO control:  $28 \pm 0.8$ ; 1  $\mu$ M AT-56:  $15 \pm 1.6$ ,  $p=0.036$ ; 5  $\mu$ M AT-56:  $7.3 \pm 1.3$ ,  $p=0.0050$ ;

481 (F) Partial rescue of oligodendrocyte differentiation by PGD2. Oligodendrocytes from  
482 PD:ibot and control mice in culture after 7 days of differentiation. Red: MBP  
483 immunofluorescence. Green: ibot-GFP, only present in cells from PD:ibot mice. Blue:  
484 DAPI labels nuclei of all cells. Scale bars: 50  $\mu$ m.

485 (G) Quantification of the percentage of lamellar cells. One-way ANOVA with Dunnett's  
486 test for multiple comparison correction. N=3-6 cultures from 3 mice per group. PD:ibot +  
487 DMSO;  $11.4 \pm 1.5$ ; PD:ibot + 1  $\mu$ M PGD2:  $32.1 \pm 1.7$ ,  $p=0.0001$  compared with PD:ibot +  
488 DMSO; PD:ibot + 2  $\mu$ M PGD2:  $25.5 \pm 3.1$ ,  $p=0.0013$  compared with PD:ibot + DMSO; wild  
489 type control:  $54 \pm 4$ ,  $p=0.0001$  compared with PD:ibot + DMSO.

490

491 culture express botulinum toxin (efficiency: 60-80%, Fig. 1G) and wild-type cells may  
492 compensate by increasing secretion when extracellular L-PGDS levels are low.

493 To determine the role of L-PGDS in oligodendrocyte development and CNS  
494 myelination, we first assessed oligodendrocyte development *in vitro* in the presence of  
495 AT-56, a specific L-PGDS inhibitor (Irikura et al., 2009). We found that AT-56 inhibits wild-  
496 type oligodendrocyte development in a dose-dependent manner *in vitro* (Fig. 6D, E),  
497 suggesting a requirement of L-PGDS in oligodendrocyte development, without affecting  
498 their survival (Figure 6-figure supplement 1).

#### 499 **L-PGDS is required for oligodendrocyte development and myelination *in vivo***

500 Having discovered the role of L-PGDS in oligodendrocyte development *in vitro*, we  
501 next assessed whether L-PGDS regulates oligodendrocyte development and myelination  
502 *in vivo*. We examined oligodendrocytes in L-PGDS global knockout mice and found a  
503 significant decrease in CC1<sup>+</sup> oligodendrocytes and MBP<sup>+</sup> myelin in the corpus callosum



Figure 7

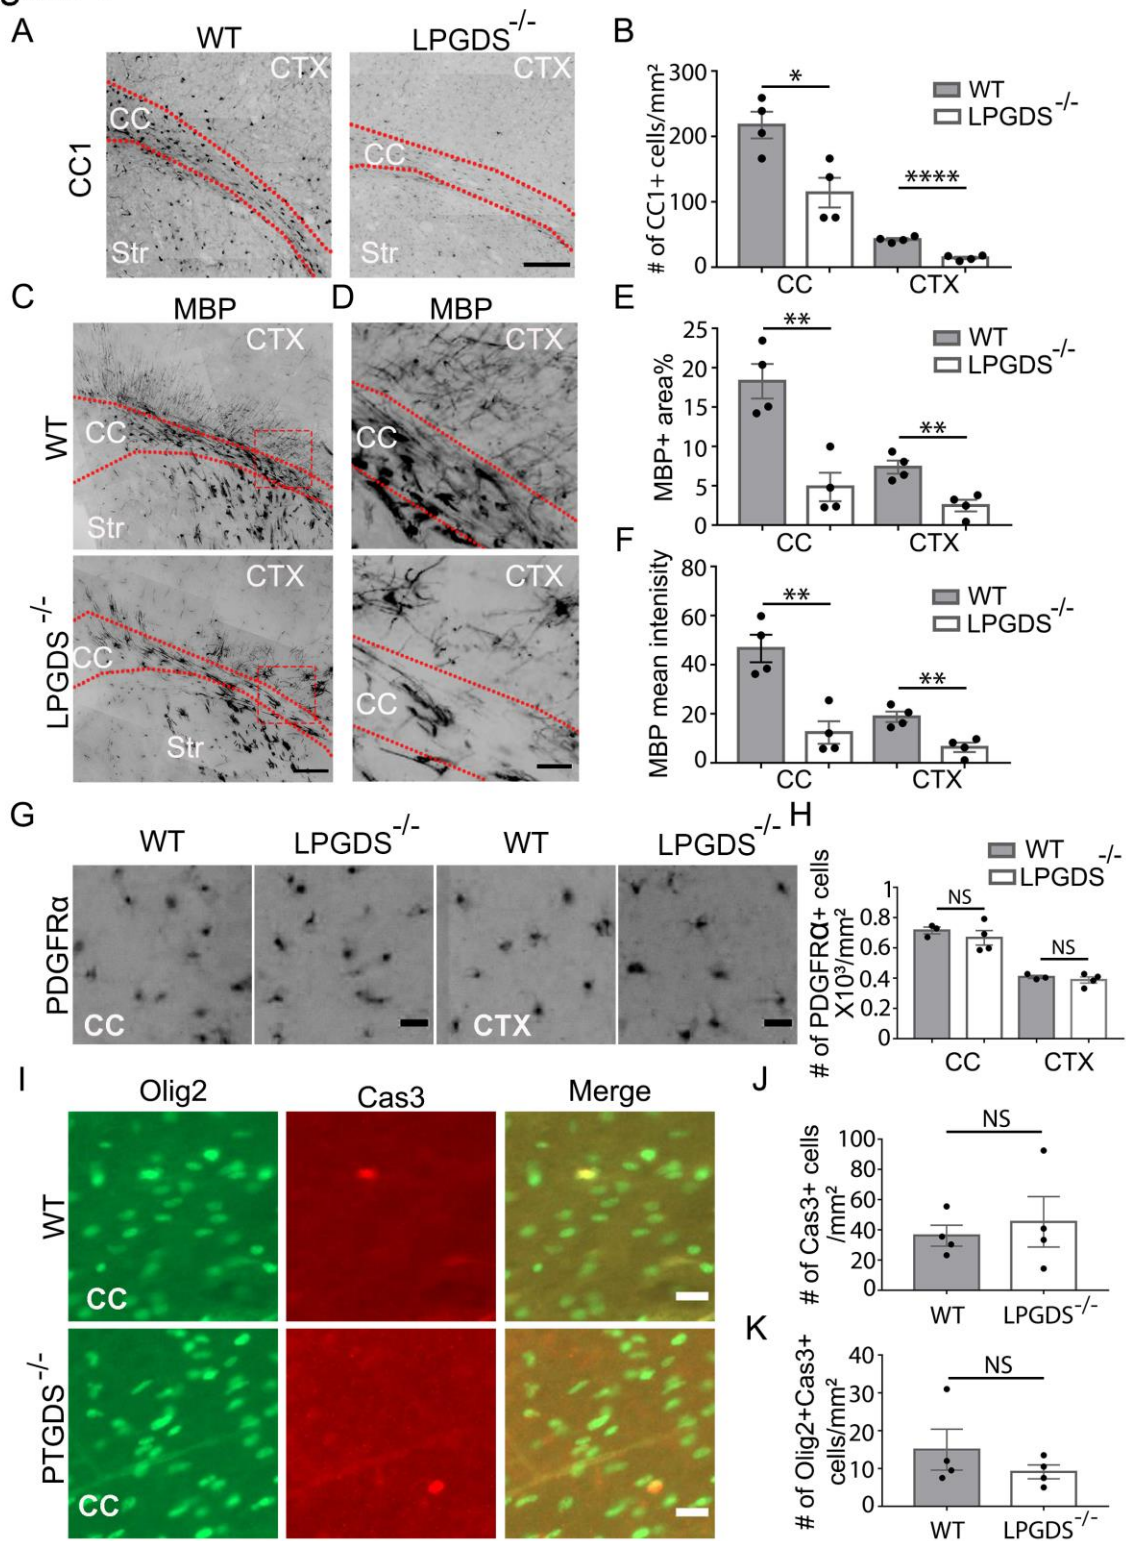

504

505 **Figure 7. Oligodendrocyte and myelin protein defect in LPGDS-knockout mice**

- 506 (A) CC1 immunofluorescence at P9. The dashed lines delineate the corpus callosum  
507 (CC). Ctx, cortex. Str, striatum. Scale bar: 200  $\mu\text{m}$ .  
508 (B) Quantification of the density of CC1<sup>+</sup> cells. N=4 mice per genotype. Corpus  
509 callosum: 217.6 $\pm$ 20.3/mm<sup>2</sup> in control, 114 $\pm$ 22.8 in knockout, p=0.015; cerebral cortex:  
510 42.5 $\pm$ 2.2 in control, 14.3 $\pm$ 2.0 in knockout, p=0.0001. Unpaired two-tailed T-test in all  
511 quantifications in this figure.  
512 (C) Myelin marker MBP immunofluorescence in the brains of LPGDS-knockout and  
513 littermate control mice at P9. Scale bar: 200  $\mu\text{m}$ .  
514 (D) Enlarged view of the boxed areas in C. Scale bar: 50  $\mu\text{m}$ .  
515 (E) Quantification of the percentage of MBP<sup>+</sup> area. N=4 mice per genotype. Corpus  
516 callosum: 18.3 $\pm$ 2.2 in control, 4.8 $\pm$ 1.8 in knockout, p=0.0033; cortex: 7.4 $\pm$ 0.8 in control,  
517 2.5 $\pm$ 0.7 in knockout, p=0.0046.  
518 (F) Quantification of the average MBP fluorescence intensities. Corpus callosum:  
519 46.6 $\pm$ 5.6 in control, 12.4 $\pm$ 4.6 in knockout, p=0.0033; cortex: 18.8 $\pm$ 2.1 in control, 6.3 $\pm$ 1.9  
520 in knockout, p=0.0046.  
521 (G) PDGFR $\alpha$  immunofluorescence at P9 in the corpus callosum and the cerebral  
522 cortex. Scale bar: 20  $\mu\text{m}$ .  
523 (H) Quantification of the density of PDGFR $\alpha$ <sup>+</sup> cells. Corpus callosum: 715.3 $\pm$ 22.7 in  
524 control, 667 $\pm$ 48.0 in knockout, p=0.46; cerebral cortex: 406.2 $\pm$ 10.3 in control, 388.3 $\pm$ 20.8  
525 in knockout, p=0.48.  
526 (I) Activated caspase-3 immunofluorescence in LPGDS-knockout and littermate  
527 control mice. Scale bar: 20  $\mu\text{m}$ .  
528 (J) Quantification of activated caspase-3<sup>+</sup> cells.  
529 (K) Quantification of activated caspase-3<sup>+</sup> oligodendrocyte-lineage cells.  
530

531 and cerebral cortex of L-PGDS-knockout mice at P9 (Fig. 7A-F). The density of OPCs  
532 (PDGFR $\alpha$ <sup>+</sup>) in the corpus callosum and cerebral cortex did not differ between L-PGDS-  
533 knockout and control mice (Fig. 7G, H).

### 534 **PGD2 restores the development of secretion-deficient oligodendrocytes**

535 Next, we determined whether the product of the L-PGDS enzyme, PGD2, is  
536 sufficient to rescue the morphological maturation defect of PD:ibot cells *in vitro*. Indeed,  
537 exogenous addition of PGD2 partially restored the percentage of cells with lamellar  
538 morphology from PD:ibot mice (Fig. 6F, G), further supporting a role of L-PGDS in  
539 oligodendrocyte development. Although other cell types could mediate the effects of  
540 systemic L-PGDS knockout, the observation that PGD2 partially rescues the

541 morphological maturation of oligodendrocytes in purified cultures *in vitro* supports a direct  
542 role of PGD2 in oligodendrocytes.

543         Given the enriched expression of L-PGDS by oligodendrocyte-lineage cells (Zhang  
544 et al., 2014, 2016) and its established localization in the extracellular space (Hoffmann et  
545 al., 1993), our results indicate that L-PGDS is an oligodendrocyte-lineage cell-secreted  
546 molecule that promotes oligodendrocyte development and myelination. Our results are  
547 consistent with the following model: OPCs secrete autocrine/paracrine signals such as L-  
548 PGDS to promote oligodendrocyte development and myelination. When VAMP1/2/3-  
549 dependent exocytosis is blocked, L-PGDS secretion is defective, and the cells upregulate  
550 the mRNA encoding L-PGDS (*Ptgds*) to compensate for the defect. Still, L-PGDS proteins  
551 cannot be released extracellularly, leading to defective oligodendrocyte development and  
552 myelination. L-PGDS-knockout mice exhibit similar defects. OPCs and oligodendrocytes  
553 secrete a variety of molecules. It is likely that other unidentified molecules also contribute  
554 to the oligodendrocyte-lineage cell-autocrine/paracrine loop. Nevertheless, our discovery  
555 of the role of L-PGDS in oligodendrocytes provides insight into the mechanisms regulating  
556 oligodendrocyte development and myelination.

557

## 558 **Discussion**

559         In this study, we showed that oligodendrocyte-lineage cell-secreted molecules  
560 promote oligodendrocyte development and myelination in an autocrine/paracrine manner.  
561 We identified L-PGDS as one such secreted molecule, thus revealing a novel cellular  
562 mechanism regulating oligodendrocyte development.

563           Previously, the roles of VAMP3 and related pathways in myelin protein delivery  
564 and oligodendrocyte morphogenesis have been investigated largely *in vitro* using cultures  
565 of an OPC-like cell line (Oli-Neu cells) or primary oligodendrocytes. For example, VAMP3  
566 and VAMP7 knockdown inhibits the transport of a myelin protein, Proteolipid Protein1 *in*  
567 *vitro* (Feldmann et al., 2011). Tetanus toxin, which cleaves VAMP1/2/3, inhibits  
568 oligodendrocyte branching *in vitro* (Sloane and Vartanian, 2007). Syntaxin4, a potential  
569 binding partner of VAMP3, is required for transcription of MBP in oligodendrocytes *in vitro*  
570 (Bijlard et al., 2015). Our study established a requirement of VAMP1/2/3-dependent  
571 exocytosis in oligodendrocyte development, myelination, and motor behavior *in vivo* and  
572 identified L-PGDS as an oligodendrocyte-lineage cell-secreted protein that promotes  
573 oligodendrocyte development and myelination.

574           VAMP1/2/3-dependent exocytosis is not the only pathway employed by  
575 oligodendrocyte-lineage cells to release molecules that mediate cell-cell interactions. For  
576 example, oligodendrocytes release exosome-like vesicles that inhibit the growth of  
577 myelin-like membranes *in vitro* (Bakhti et al., 2011). Tetanus toxin cleaves VAMP1/2/3  
578 but does not affect exosome release (Fader et al., 2009). Therefore, the role of  
579 VAMP1/2/3-dependent exocytosis in promoting myelination and the effect of exosome-  
580 like vesicles in inhibiting myelination are likely parallel pathways independent of each  
581 other. In future studies, it could be interesting to determine the signals that regulate  
582 VAMP1/2/3-dependent exocytosis and VAMP1/2/3-independent exosome release during  
583 development and disease *in vivo* and thus define how these two seemingly opposing  
584 effects are coordinated to shape precise and dynamic myelination.

585 Our caspase-3 immunohistochemistry results did not show a difference in cell  
586 survival between PD:ibot and control cells, though we cannot exclude that cells die  
587 through non-apoptotic mechanisms or that microglia clear dying cells too rapidly for  
588 accurate counting.

589 OPCs are present throughout the CNS in adults (Hughes et al., 2013; Kang et al.,  
590 2010), even in demyelinated lesions in patients with multiple sclerosis (Franklin, 2002).  
591 Therefore, inducing oligodendrocyte and new myelin formation is an attractive strategy  
592 for treating demyelinating diseases. However, remyelination therapy has not been  
593 successful so far (Franklin, 2002), underscoring the need for a more complete  
594 understanding of the mechanisms regulating oligodendrocyte and myelin development.  
595 Our discovery of the role of L-PGDS in oligodendrocyte development and myelination  
596 adds to the knowledge of the molecular regulation of myelination. Interestingly, the *Ptgds*  
597 gene is lower in OPCs from multiple sclerosis patients than those from healthy controls  
598 (Jäkel et al., 2019). During remyelination in mice, PGD2 levels increase (Penkert et al.,  
599 2021). These observations and our results are consistent with the possible involvement  
600 of L-PGDS and PGD2 in remyelination. Future studies should investigate the role of L-  
601 PGDS in promoting remyelination.

602 A recent study shows that the gene encoding L-PGDS, *Ptgds*, marks a  
603 subpopulation of OPCs more resilient to spinal cord injury than other OPCs (Floriddia et  
604 al., 2020). Thus, the function of L-PGDS in OPC responses to injury and other  
605 neurological disorders will be interesting to explore in the future.

606 The product of the L-PGDS enzyme, PGD2, binds and activates two G-protein-  
607 coupled receptors, DP1 and DP2 (Gpr44) (Narumiya and Furuyashiki, 2011). In addition,

608 PGD2 undergoes non-enzymatic conversion to 15d-PGJ2, which activates the  
609 peroxisome proliferator-activated receptor- $\gamma$  (Scher and Pillinger, 2005). Future studies  
610 should aim to identify the receptor(s) that mediates the effect of L-PGDS on  
611 oligodendrocyte development and myelination, as well as the downstream signaling  
612 pathways.

613 OPCs and oligodendrocytes secrete many molecules (Zhang et al., 2014).  
614 Although we identified the role of L-PGDS in oligodendrocyte development, our results  
615 do not rule out contributions from other secreted molecules. Our RNA-seq dataset  
616 provides a roadmap for future investigation of the roles of additional oligodendrocyte-  
617 lineage cell-secreted molecules in the brain.

618 Blocking exocytosis with botulinum toxin B may reduce the delivery of proteins and  
619 lipids to the plasma membrane, therefore causing cell-autonomous effects on  
620 oligodendrocyte development in addition to blocking secretion. Both cell-autonomous and  
621 cell-non-autonomous mechanisms may be involved in the effect of blocking exocytosis  
622 on oligodendrocyte development. Our insert rescue experiment (Fig. 4K-M) strongly  
623 supports the importance of secreted molecules but does not rule out cell-autonomous  
624 mechanisms. Investigating how the exocytosis pathway may contribute to  
625 oligodendrocyte development in a cell-autonomous manner may complement our study  
626 and improve the understanding of the role of VAMP1/2/3-dependent exocytosis in  
627 oligodendrocyte and myelin development in the future.

628

629 **Acknowledgments**

630 We thank Akiko Nishiyama, J. Bradley Zuchero, Hui Zong, and Mable Lam for their  
631 advice and editing of our manuscript. We thank Qingyun Li, Richard Breyer, Henry Lin,  
632 and Ginger Milne for their advice. We thank Garret FitzGerald for reagents. We thank the  
633 Eli and Edythe Broad Center of Regenerative Medicine and Stem Cell Research, UCLA  
634 BioSequencing Core Facility for their services, Mahnaz Akhavan and Suhua Feng for  
635 their technical support. This work is supported by the Knaub Postdoctoral Fellowship to  
636 L.P., the National Institute of Neurological Disorders and Stroke of the National Institute  
637 of Health (NIH) R00NS089780 and R01NS109025, the National Institute of Aging of the  
638 NIH R03AG065772, the National Center for Advancing Translational Science UCLA CTSI  
639 Grant UL1TR001881, the W. M. Keck Foundation Junior Faculty Award, the UCLA Eli  
640 and Edythe Broad Center of Regenerative Medicine and Stem Cell Research Innovation  
641 Award, the Ablon Faculty Scholar Award, and the Friends of the Semel Institute for  
642 Neuroscience & Human Behavior Friends Scholar Award to Y.Z.

643

#### 644 **Author Contributions**

645 L.P. and Y.Z. conceived of the project and designed the experiments. L.P. performed  
646 most of the experiments. A.T. and L.P. analyzed the L-PGDS-knockout mice under the  
647 supervision of C.T. and Y.Z. L.O.S. contributed to experimental design. A.J.Z. assisted in  
648 mouse colony management and immunohistochemistry experiments. K.F., and Y.U.  
649 provided the L-PGDS-knockout mice. L.P. and Y.Z. analyzed the data and wrote the  
650 paper. All authors read the manuscript.

651

#### 652 **Declaration of Interests**

653 Y.Z. consulted for Ono Pharmaceuticals. All other authors declare no competing financial  
654 interests.

655

## 656 **Materials and Methods**

657

### 658 **Lead contact and materials availability**

659 Further information and requests for resources and reagents should be directed to  
660 and will be fulfilled by the Lead Contact, Ye Zhang ([yezhang@ucla.edu](mailto:yezhang@ucla.edu)). This study did  
661 not generate new unique reagents.

### 662 **Experimental animals**

663 All animal experimental procedures were approved by the Chancellor's Animal  
664 Research Committee at the University of California, Los Angeles, and conducted in  
665 compliance with national and state laws and policies. All the mice were group-housed in  
666 standard cages (maximum 5 mice per cage). Rooms were maintained on a 12-hour  
667 light/dark cycle. PDGFR $\alpha$ -CreER (Jax #018280) and ibot (Jax #018056) mice were  
668 obtained from Jackson Laboratories.

### 669 **OPC purification and culture**

670 Whole brains excluding the olfactory bulbs and the cerebellum from one pup at  
671 postnatal day 7 to day 8 were used to make each batch of OPC culture. OPCs were  
672 purified using an immunopanning method described before (Emery and Dugas, 2013).  
673 Briefly, the brains were digested into single-cell suspensions using papain. Microglia and  
674 differentiated oligodendrocytes were depleted using anti-CD45 antibody- (BD  
675 Pharmingen, cat #550539) and GalC hybridoma-coated panning plates, respectively.



676 OPCs were then collected using an O4 hybridoma-coated panning plate. For most culture  
677 experiments, cells were plated on 24-well plates at a density of 30,000 per well. For  
678 comparison of OPC differentiation at different densities, OPCs were plated at densities of  
679 5,000 per well and 40,000 per well. For all experiments, OPCs were first kept in  
680 proliferation medium containing growth factors PDGF (10 µg/ml, Peprotech, cat #100-  
681 13A), CNTF (10 µg/ml, Peprotech, cat #450-13), and NT-3 (1 µg/ml, Peprotech, cat #450-  
682 03) for two to three days, and then switched to differentiation medium containing thyroid  
683 hormone (40 ng/ml, Sigma, cat #T6397-100MG) but without PDGF or NT-3 for seven  
684 days to differentiate them into oligodendrocytes as previously described (Emery and  
685 Dugas, 2013). Half of the culture media was replaced with fresh media every other day.  
686 All the cells were maintained in a humidified 37°C incubator with 10% CO<sub>2</sub>. Cells from  
687 both female and male mice were used. For coculture experiments with inserts, OPCs  
688 were purified from PD:ibot and littermate control mice as described above. 100,000 cells  
689 per well were plated on inserts with 1-µm diameter pores (VWR, cat #62406-173), and  
690 the inserts were placed on top of wells with cells plated at 40,000 cells per well density  
691 on 24-well culture plates. 200 µl medium was added per insert and 500 µl medium was  
692 added per well under the inserts.

### 693 **Drugs and treatment**

694 4-hydroxy-tamoxifen stock solutions were made by dissolving 4-hydroxy-  
695 tamoxifen (Sigma, H7904) into pure ethanol at 10 mg/ml. The stock solutions were stored  
696 at -80°C until use. On the day of injection, an aliquot of 4-hydroxy-tamoxifen stock solution  
697 (100 µl) was thawed and mixed with 500 µl sunflower oil by vortexing for 5 min. Ethanol  
698 in the solution was vacuum evaporated in a desiccator (VWR, 89054-050) for an hour.

699 0.1 mg 4-hydroxy-tamoxifen was injected into each mouse subcutaneously daily for 2  
700 days at P2 and P4. An L-PGDS inhibitor, AT-56 (Cayman Chemicals, cat #13160), and  
701 prostaglandin D2 (Cayman Chemicals, cat #12010) were dissolved in dimethyl sulfoxide  
702 (DMSO). To inhibit L-PGDS activity *in vitro*, AT-56 was added to the oligodendrocyte  
703 culture medium at 1  $\mu$ M and 5  $\mu$ M every other day. For prostaglandin D2 treatment,  
704 prostaglandin D2 was added to the oligodendrocyte culture medium at 1  $\mu$ M and 2  $\mu$ M  
705 every 12 hours. An equal amount of DMSO was added to the control wells. Because a  
706 metabolite of prostaglandin D2, 15-d-prostaglandin J2, induces cell death, which can be  
707 prevented by N-acetyl cysteine(Lee et al., 2008), we included 1 mM N-acetyl cysteine,  
708 which is shown to improve cell survival, in the culture media of prostaglandin D2-treated  
709 and control cells.

#### 710 **RNA-seq**

711 Total RNA was extracted using the miRNeasy Mini kit (Qiagen cat #217004). The  
712 concentrations and integrities of the RNA were measured using TapeStation (Agilent) and  
713 Qubit. cDNA was generated using the Nugen Ovation V2 kit (Nugen) and fragmented  
714 using the Covaris sonicator. Sequencing libraries were prepared using the Next Ultra  
715 RNA Library Prep kit (New England Biolabs) with 12 cycles of PCR amplification. An  
716 Illumina HiSeq 4000 sequencer was used to sequence these libraries and each sample  
717 had an average of  $19.1 \pm 2.9$  million 50-bp single-end reads.

#### 718 **RNA-seq data analysis**

719 The STAR package was used to map reads to mouse genome mm10 and HTSEQ  
720 was used to obtain raw counts from sequencing reads. EdgeR-Limma-Voom packages

721 in R were used to calculate Reads per Kilobase per Million Mapped Reads (RPKM) values  
722 from raw counts. The DESeq2 package was used to analyze differential gene expression.

### 723 **Immunohistochemistry and immunocytochemistry**

724 Mice were anesthetized with isoflurane and transcardially perfused with  
725 phosphate-buffered saline (PBS) followed by 4% paraformaldehyde (PFA). The brains  
726 were removed and post-fixed in 4% PFA at 4°C overnight. The brains were washed with  
727 PBS and cryoprotected in 30% sucrose at 4°C for two days before embedding in optimal  
728 cutting temperature compound (Fisher, cat #23-730-571) and stored at -80°C. The brains  
729 were sectioned using a cryostat (Leica) into 30- $\mu$ m-thick sections and floating sections  
730 were blocked and permeabilized in 5% donkey serum with 0.3% Tween-20 in PBS and  
731 then stained with primary antibodies against GFP (Aves Labs, Inc, cat #GFP-1020,  
732 dilution 1:500), PDGFR $\alpha$  (R&D Systems, cat #AF1062, dilution 1:500), Olig2 (Millipore,  
733 cat #211F1.1, dilution 1:500), CC1 (Millipore, cat #OP80, dilution 1:500), MBP (Abcam,  
734 cat #ab7349, dilution 1:500), and cleaved caspase-3 (Cell Signaling, cat #9661S, dilution  
735 1:500) at 4°C overnight. Sections were washed three times with PBS and incubated with  
736 fluorescent secondary antibodies (Invitrogen) at 4°C overnight. Sections were mounted  
737 onto Superfrost Plus micro slides (Fisher, cat #12-550-15) and covered with mounting  
738 medium (Fisher, cat #H1400NB) and glass coverslips.

739 For immunocytochemistry of cultured cells, cells were fixed with 4% PFA and 0.3%  
740 Tween-20 in PBS. After blocking in 5% donkey serum, cells were then stained with the  
741 primary antibodies described above and BrdU antibodies (Abcam, cat #ab6326, 1:500)  
742 at 4°C overnight. After three washes in PBS, cells were stained with secondary antibodies  
743 and CellMask Blue (Invitrogen, cat #H32720, 1:1,000) at 4°C overnight. Cells were

744 covered with mounting medium (Fisher, cat #H1400NB). The slides were imaged with a  
745 Zeiss Apotome epifluorescence microscope.

746 Fluorescence microscopy images were cropped and brightness contrast was  
747 adjusted with identical settings across genotype, treatment, and control groups using  
748 Photoshop and ImageJ. All the images were randomly renamed using the following  
749 website (<https://www.random.org/>) and quantified with the experimenter blinded to the  
750 genotype and treatment condition of the samples. Cells with MBP<sup>+</sup> membrane spreading  
751 out were identified as lamellar cells. The illustrations were made with Biorender.

## 752 **Transmission electron microscopy**

753 Brain specimens for transmission electron microscopy were prepared as described  
754 before (Salazar et al., 2018). Mice were anesthetized using isoflurane and transcardially  
755 perfused with 0.1M phosphate buffer (PB) followed by 4% PFA with 2.5% glutaraldehyde  
756 in 0.1M PB buffer. Brains were removed and post-fixed in 4% PFA with 2.5%  
757 glutaraldehyde in 0.1M PB for another two days. Brains were sliced with Young Mouse  
758 Brain Slicer Matrix (Zivic Instruments, cat #BSMYS001-1) and a small piece of the corpus  
759 callosum was isolated from brain sections at 0-1 mm anterior to Bregma. After wash,  
760 samples were then post-fixed in 1% osmium tetroxide in 0.1M PB (pH 7.4) and dehydrated  
761 through a graded series of ethanol concentrations. After infiltration with Eponate 12 resin,  
762 the samples were embedded in fresh Eponate 12 resin and polymerized at 60°C for 48  
763 hours. Ultrathin sections of 70 nm thickness were prepared and placed on  
764 formvar/carbon-coated copper grids and stained with uranyl acetate and lead citrate. The  
765 grids were examined using a JEOL 100CX transmission electron microscope at 60 kV  
766 and images were captured by an AMT digital camera (Advanced Microscopy Techniques

767 Corporation, model XR611) by the Electron Microscopy Core Facility, UCLA Brain  
768 Research Institute.

### 769 **Western blot**

770 We purified OPCs from PD:ibot and control mice by immunopanning and cultured  
771 them in proliferation medium for 2-3 days and differentiation medium for 7 days as  
772 described above. To collect secreted samples, culture media were mixed with  
773 ethylenediaminetetraacetic acid (EDTA)-free protease inhibitor cocktail (Sigma, cat  
774 #4693159001) at a 6:1 ratio and centrifuged at 1000 × g for 10 min to remove dead cells  
775 and debris. To collect whole-cell lysates, cells were washed with PBS, lysed with  
776 radioimmunoprecipitation assay buffer containing EDTA-free protease inhibitor cocktail,  
777 and centrifuged at 12,000 × g for 10 min to remove cell debris.

778 All samples were mixed with sodium dodecyl sulfate (SDS) sample buffer (Fisher,  
779 cat # AAJ60660AC) and 2-mercaptoethanol before boiling for 5 min. Samples were  
780 separated by SDS-polyacrylamide gel electrophoresis, followed by transferring to  
781 polyvinylidene difluoride membranes via wet transfer at 300 mA for 1.5 hours. Membranes  
782 were blocked with clear milk blocking buffer (Fisher, cat #PI37587) for 1 hour at room  
783 temperature and incubated with primary antibodies against LPGDS (Santa Cruz  
784 Biotechnology, cat #sc-390717, dilution 1:1000), GAPDH (Sigma, cat #CB1001, dilution  
785 1:5000), BoNT-B Light Chain (R&D Systems, cat #AF5420-SP, dilution 1:1000), VAMP2  
786 (Synaptic Systems, cat #104 211, dilution 1:1000), and MBP (Abcam, cat #ab7349,  
787 dilution 1:1000) at 4°C overnight. Membranes were washed with tris-buffered saline with  
788 Tween 20 (TBST) three times and incubated with horseradish peroxidase-conjugated  
789 secondary antibodies (Mouse, Cell Signaling, cat #7076S; Rabbit, Cell Signaling, cat

790 #7074S; Rat, Cell Signaling, cat #7077S; Sheep, Thermo Fisher, cat #A16041) for 1 hour  
791 at room temperature. After three washes in TBST buffer, SuperSignal™ West Femto  
792 Maximum Sensitivity Substrate (Fisher, cat #PI34095) was added to the membranes, and  
793 the signal was visualized using a ChemiDoc™ MP Imaging system (BIO-RAD).

#### 794 **Motor behavior**

795 Mice were familiarized with being picked up and handled by the experimenter daily  
796 for three days before the test to reduce stress. Mice were also habituated to the rotarod  
797 testing room for 15 min prior to all testing. Both male and female adult mice (2 to 5 months  
798 old) were used in the rotarod test. Mice were given three trials per day for three  
799 consecutive days (5-60 rpm over 5 min, with approximately 30 min between successive  
800 trials). The latency to fall was measured and the experimenter was blinded to the  
801 genotype of the mice during the test.

#### 802 **Quantification and statistical analysis**

803 The numbers of animals and replicates are described in the figures and figure  
804 legends. The RNA-seq data were analyzed using the DESeq2 package. Adjusted P-  
805 values smaller than 0.05 were considered significant. For all non-RNA-seq data, analyses  
806 were conducted using Prism 8 software (Graphpad). The normality of data was tested by  
807 the Shapiro-Wilke test. For data with a normal distribution, Welch's t-test was used for  
808 two-group comparisons and one-way ANOVA was used for multi-group comparisons. An  
809 estimate of variation in each group is indicated by the standard error of the mean (S.E.M.).  
810 \*  $p < 0.05$ , \*\*  $p < 0.01$ , \*\*\*  $p < 0.001$ . An appropriate sample size was determined when the  
811 study was being designed based on published studies with similar approaches and focus  
812 as our study. A biological replicate is defined as one mouse. Different culture wells from

813 the same mouse or different images taken from the brains or cell cultures from the same  
814 mouse are defined as technical replicates. All statistical tests were performed with each  
815 biological replicate/mouse as an independent observation. The number of times each  
816 experiment was performed is indicated in figure legends. No data were excluded from the  
817 analyses. Mice and cell cultures were randomly assigned to treatment and control groups.  
818 Imaging analyses and behavior tests were conducted when the experimenter was blinded  
819 to the genotypes or treatment conditions.

## 820 **Data availability**

821 We deposited all RNA-seq data to the Gene Expression Omnibus under accession  
822 number GSE168569. All relevant data are available from the authors without restrictions.

## 823 **Code availability**

824 This study did not generate new codes.

825  
826

## 827 **References**

- 828 Aggarwal, S., Snaidero, N., Pähler, G., Frey, S., Sánchez, P., Zweckstetter, M.,  
829 Janshoff, A., Schneider, A., Weil, M.T., Schaap, I.A.T., et al. (2013). Myelin Membrane  
830 Assembly Is Driven by a Phase Transition of Myelin Basic Proteins Into a Cohesive  
831 Protein Meshwork. *PLoS Biol.* 11.
- 832 Antonin, W., Holroyd, C., Fasshauer, D., Pabst, S., Von Mollard, G.F., and Jahn, R.  
833 (2000). A SNARE complex mediating fusion of late endosomes defines conserved  
834 properties of SNARE structure and function. *EMBO J.* 19.
- 835 Bakhti, M., Winter, C., and Simons, M. (2011). Inhibition of myelin membrane sheath  
836 formation by oligodendrocyte-derived exosome-like vesicles. *J. Biol. Chem.* 286.

837 Bergles, D.E., and Richardson, W.D. (2016). Oligodendrocyte development and  
838 plasticity. *Cold Spring Harb. Perspect. Biol.* 8.

839 Bijlard, M., Klunder, B., de Jonge, J.C., Nomden, A., Tyagi, S., de Vries, H., Hoekstra,  
840 D., and Baron, W. (2015). Transcriptional Expression of Myelin Basic Protein in  
841 Oligodendrocytes Depends on Functional Syntaxin 4: a Potential Correlation with  
842 Autocrine Signaling. *Mol. Cell. Biol.* 35.

843 Budde, H., Schmitt, S., Fitzner, D., Opitz, L., Salinas-Riester, G., and Simons, M.  
844 (2010). Control of oligodendroglial cell number by the miR-17-92 cluster. *Development*  
845 137.

846 Butovsky, O., Landa, G., Kunis, G., Ziv, Y., Avidan, H., Greenberg, N., Schwartz, A.,  
847 Smirnov, I., Pollack, A., Jung, S., et al. (2006). Induction and blockage of  
848 oligodendrogenesis by differently activated microglia in an animal model of multiple  
849 sclerosis. *J. Clin. Invest.* 116.

850 Chen, Y.A., and Scheller, R.H. (2001). Snare-mediated membrane fusion. *Nat. Rev.*  
851 *Mol. Cell Biol.* 2.

852 Conner, C.E., Kelly, R.W., and Hume, R. (2001). Regulation of prostaglandin availability  
853 in human fetal lung by differential localisation of prostaglandin H synthase-1 and  
854 prostaglandin dehydrogenase. *Histochem. Cell Biol.* 116.

855 Dombrowski, Y., O'Hagan, T., Dittmer, M., Penalva, R., Mayoral, S.R., Bankhead, P.,  
856 Fleville, S., Eleftheriadis, G., Zhao, C., Naughton, M., et al. (2017). Regulatory T cells  
857 promote myelin regeneration in the central nervous system. *Nat. Neurosci.* 20.

858 Dugas, J.C., Cuellar, T.L., Scholze, A., Ason, B., Ibrahim, A., Emery, B., Zamanian, J.L.,  
859 Foo, L.C., McManus, M.T., and Barres, B.A. (2010). Dicer1 and miR-219 Are Required



860 for Normal Oligodendrocyte Differentiation and Myelination. *Neuron* 65.

861 Eguchi, N., Minami, T., Shirafuji, N., Kanaoka, Y., Tanaka, T., Nagata, A., Yoshida, N.,  
862 Urade, Y., Ito, S., and Hayaishi, O. (1999). Lack of tactile pain (allodynia) in lipocalin-  
863 type prostaglandin D synthase-deficient mice. *Proc. Natl. Acad. Sci. U. S. A.* 96.

864 Elbaz, B., and Popko, B. (2019). Molecular Control of Oligodendrocyte Development.  
865 *Trends Neurosci.* 42.

866 Elbaz, B., Aaker, J.D., Isaac, S., Kolarzyk, A., Brugarolas, P., Eden, A., and Popko, B.  
867 (2018). Phosphorylation State of ZFP24 Controls Oligodendrocyte Differentiation. *Cell*  
868 *Rep.* 23.

869 Emery, B., and Dugas, J.C. (2013). Purification of oligodendrocyte lineage cells from  
870 mouse cortices by immunopanning. *Cold Spring Harb Protoc* 2013, 854–868.

871 Emery, B., and Lu, Q.R. (2015). Transcriptional and epigenetic regulation of  
872 oligodendrocyte development and myelination in the central nervous system. *Cold*  
873 *Spring Harb. Perspect. Biol.* 7.

874 Emery, B., Agalliu, D., Cahoy, J.D., Watkins, T.A., Dugas, J.C., Mulinyawe, S.B.,  
875 Ibrahim, A., Ligon, K.L., Rowitch, D.H., and Barres, B.A. (2009). Myelin Gene  
876 Regulatory Factor Is a Critical Transcriptional Regulator Required for CNS Myelination.  
877 *Cell* 138, 172–185.

878 Fader, C.M., Sánchez, D.G., Mestre, M.B., and Colombo, M.I. (2009). TI-VAMP/VAMP7  
879 and VAMP3/cellubrevin: two v-SNARE proteins involved in specific steps of the  
880 autophagy/multivesicular body pathways. *Biochim. Biophys. Acta - Mol. Cell Res.* 1793.

881 Fedder-Semmes, K.N., and Appel, B. (2021). The akt-mtor pathway drives myelin  
882 sheath growth by regulating cap-dependent translation. *J. Neurosci.* 41.

883 Feldmann, A., Winterstein, C., White, R., Trotter, J., and Krämer-Albers, E.M. (2009).  
884 Comprehensive analysis of expression, subcellular localization, and cognate pairing of  
885 SNARE proteins in oligodendrocytes. *J. Neurosci. Res.* 87.

886 Feldmann, A., Amphornrat, J., Schönherr, M., Winterstein, C., Möbius, W., Ruhwedel,  
887 T., Danglot, L., Nave, K.A., Galli, T., Bruns, D., et al. (2011). Transport of the major  
888 myelin proteolipid protein is directed by VAMP3 and VAMP7. *J. Neurosci.* 31.

889 Floriddia, E.M., Lourenço, T., Zhang, S., van Bruggen, D., Hilscher, M.M., Kukanja, P.,  
890 Gonçalves dos Santos, J.P., Altınkök, M., Yokota, C., Llorens-Bobadilla, E., et al.  
891 (2020). Distinct oligodendrocyte populations have spatial preference and different  
892 responses to spinal cord injury. *Nat. Commun.* 11.

893 Foerster, S., Guzman de la Fuente, A., Kagawa, Y., Bartels, T., Owada, Y., and  
894 Franklin, R.J.M. (2020). The fatty acid binding protein FABP7 is required for optimal  
895 oligodendrocyte differentiation during myelination but not during remyelination. *Glia* 68.

896 Franklin, R.J.M. (2002). Why does remyelination fail in multiple sclerosis? *Nat. Rev.*  
897 *Neurosci.* 3.

898 Fünfschilling, U., Supplie, L.M., Mahad, D., Boretius, S., Saab, A.S., Edgar, J.,  
899 Brinkmann, B.G., Kassmann, C.M., Tzvetanova, I.D., Möbius, W., et al. (2012).  
900 Glycolytic oligodendrocytes maintain myelin and long-term axonal integrity. *Nature* 485.

901 Gibson, E.M., Purger, D., Mount, C.W., Goldstein, A.K., Lin, G.L., Wood, L.S., Inema, I.,  
902 Miller, S.E., Bieri, G., Zuchero, J.B., et al. (2014). Neuronal activity promotes  
903 oligodendrogenesis and adaptive myelination in the mammalian brain. *Science* (80-. ).  
904 344.

905 Gruchot, J., Weyers, V., Göttle, P., Förster, M., Hartung, H.P., Küry, P., and Kremer, D.

906 (2019). The Molecular Basis for Remyelination Failure in Multiple Sclerosis. *Cells* 8.  
907 Harrington, E.P., Zhao, C., Fancy, S.P.J., Kaing, S., Franklin, R.J.M., and Rowitch, D.H.  
908 (2010). Oligodendrocyte PTEN is required for myelin and axonal integrity, not  
909 remyelination. *Ann. Neurol.* 68.  
910 Herbert, A.L., and Monk, K.R. (2017). Advances in myelinating glial cell development.  
911 *Curr. Opin. Neurobiol.* 42.  
912 Hill, R.A., Patel, K.D., Goncalves, C.M., Grutzendler, J., and Nishiyama, A. (2014).  
913 Modulation of oligodendrocyte generation during a critical temporal window after NG2  
914 cell division. *Nat. Neurosci.* 17.  
915 Hines, J.H., Ravanelli, A.M., Schwandt, R., Scott, E.K., and Appel, B. (2015). Neuronal  
916 activity biases axon selection for myelination in vivo. *Nat. Neurosci.* 18.  
917 Hoai, T., Tran, T., Zeng, Q., and Hong, W. (2007). VAMP4 cycles from the cell surface  
918 to the trans-Golgi network via sorting and recycling endosomes. *J. Cell Sci.* 120.  
919 Hoffmann, A., Conradt, H.S., Gross, G., Nimtz, M., Lottspeich, F., and Wurster, U.  
920 (1993). Purification and Chemical Characterization of  $\beta$ -Trace Protein from Human  
921 Cerebrospinal Fluid: Its Identification as Prostaglandin D Synthase. *J. Neurochem.* 61.  
922 Howng, S.Y.B., Avila, R.L., Emery, B., Traka, M., Lin, W., Watkins, T., Cook, S.,  
923 Bronson, R., Davisson, M., Barres, B.A., et al. (2010). ZFP191 is required by  
924 oligodendrocytes for CNS myelination. *Genes Dev.* 24.  
925 Hughes, E.G., Kang, S.H., Fukaya, M., and Bergles, D.E. (2013). Oligodendrocyte  
926 progenitors balance growth with self-repulsion to achieve homeostasis in the adult  
927 brain. *Nat. Neurosci.* 16.  
928 Irikura, D., Aritake, K., Nagata, N., Maruyama, T., Shimamoto, S., and Urade, Y. (2009).

929 Biochemical, functional, and pharmacological characterization of AT-56, an orally active  
930 and selective inhibitor of lipocalin-type prostaglandin D synthase. *J. Biol. Chem.* 284.  
931 Jäkel, S., Agirre, E., Mendanha Falcão, A., van Bruggen, D., Lee, K.W., Knuesel, I.,  
932 Malhotra, D., French-Constant, C., Williams, A., and Castelo-Branco, G. (2019). Altered  
933 human oligodendrocyte heterogeneity in multiple sclerosis. *Nature* 566.  
934 Kang, H.J., Kawasaki, Y.I., Cheng, F., Zhu, Y., Xu, X., Li, M., Sousa, A.M.M., Pletikos,  
935 M., Meyer, K.A., Sedmak, G., et al. (2011). Spatio-temporal transcriptome of the human  
936 brain. *Nature* 478, 483–489.  
937 Kang, S.H., Fukaya, M., Yang, J.K., Rothstein, J.D., and Bergles, D.E. (2010). NG2+  
938 CNS glial progenitors remain committed to the oligodendrocyte lineage in postnatal life  
939 and following neurodegeneration. *Neuron* 68.  
940 Koenning, M., Jackson, S., Hay, C.M., Faux, C., Kilpatrick, T.J., Willingham, M., and  
941 Emery, B. (2012). Myelin gene regulatory factor is required for maintenance of myelin  
942 and mature oligodendrocyte identity in the adult CNS. *J. Neurosci.* 32.  
943 Larson, V.A., Mironova, Y., Vanderpool, K.G., Waisman, A., Rash, J.E., Agarwal, A.,  
944 and Bergles, D.E. (2018). Oligodendrocytes control potassium accumulation in white  
945 matter and seizure susceptibility. *Elife* 7.  
946 Lee, S.J., Kim, M.S., Park, J.Y., Woo, J.S., and Kim, Y.K. (2008). 15-Deoxy- $\Delta^{12,14}$ -  
947 prostaglandin J2 induces apoptosis via JNK-mediated mitochondrial pathway in  
948 osteoblastic cells. *Toxicology* 248.  
949 Lubetzki, C., Zalc, B., Williams, A., Stadelmann, C., and Stankoff, B. (2020).  
950 Remyelination in multiple sclerosis: from basic science to clinical translation. *Lancet*  
951 *Neurol.* 19.

952 Madison, D.L., Krueger, W.H., Cheng, D., Trapp, B.D., and Pfeiffer, S.E. (1999).  
953 SNARE complex proteins, including the cognate pair VAMP-2 and syntaxin- 4, are  
954 expressed in cultured oligodendrocytes. *J. Neurochem.* 72.

955 Mayoral, S.R., Etxeberria, A., Shen, Y.A.A., and Chan, J.R. (2018). Initiation of CNS  
956 Myelination in the Optic Nerve Is Dependent on Axon Caliber. *Cell Rep.* 25.

957 Mitew, S., Gobijs, I., Fenlon, L.R., McDougall, S.J., Hawkes, D., Xing, Y.L., Bujalka, H.,  
958 Gundlach, A.L., Richards, L.J., Kilpatrick, T.J., et al. (2018). Pharmacogenetic  
959 stimulation of neuronal activity increases myelination in an axon-specific manner. *Nat.*  
960 *Commun.* 9.

961 Montal, M. (2010). Botulinum neurotoxin: A marvel of protein design. *Annu. Rev.*  
962 *Biochem.* 79.

963 Mukherjee, C., Kling, T., Russo, B., Miebach, K., Kess, E., Schifferer, M., Pedro, L.D.,  
964 Weikert, U., Fard, M.K., Kannaiyan, N., et al. (2020). Oligodendrocytes Provide  
965 Antioxidant Defense Function for Neurons by Secreting Ferritin Heavy Chain. *Cell*  
966 *Metab.* 32.

967 Narumiya, S., and Furuyashiki, T. (2011). Fever, inflammation, pain and beyond:  
968 prostanoid receptor research during these 25 years. *FASEB J.* 25.

969 Nawaz, S., Sánchez, P., Schmitt, S., Snaidero, N., Mitkovski, M., Velte, C., Brückner,  
970 B.R., Alexopoulos, I., Czopka, T., Jung, S.Y., et al. (2015). Actin Filament Turnover  
971 Drives Leading Edge Growth during Myelin Sheath Formation in the Central Nervous  
972 System. *Dev. Cell* 34.

973 Osso, L.A., Rankin, K.A., and Chan, J.R. (2021). Experience-dependent myelination  
974 following stress is mediated by the neuropeptide dynorphin. *Neuron* 109.

975 Paukert, M., Agarwal, A., Cha, J., Doze, V.A., Kang, J.U., and Bergles, D.E. (2014).  
976 Norepinephrine controls astroglial responsiveness to local circuit activity. *Neuron* 82.  
977 Penkert, H., Bertrand, A., Tiwari, V., Breimann, S., Muller, S.A., and Simons, M. (2021).  
978 Proteomic and lipidomic profiling of demyelinating lesions identifies fatty acids as  
979 modulators in lesion recovery. *Cell Rep.* 37, 109898.  
980 Pobbati, A. V., Stein, A., and Fasshauer, D. (2006). N- to C-terminal SNARE complex  
981 assembly promotes rapid membrane fusion. *Science* (80-. ). 313.  
982 Pols, M.S., Van Meel, E., Oorschot, V., Ten Brink, C., Fukuda, M., Swetha, M.G.,  
983 Mayor, S., and Klumperman, J. (2013). HVps41 and VAMP7 function in direct TGN to  
984 late endosome transport of lysosomal membrane proteins. *Nat. Commun.* 4.  
985 Poulain, B., Tauc, L., Maisey, E.A., Wadsworth, J.D.F., Mohan, P.M., and Dolly, J.O.  
986 (1988). Neurotransmitter release is blocked intracellularly by botulinum neurotoxin, and  
987 this requires uptake of both toxin polypeptides by a process mediated by the larger  
988 chain. *Proc. Natl. Acad. Sci. U. S. A.* 85.  
989 Redmond, S.A., Mei, F., Eshed-Eisenbach, Y., Osso, L.A., Leshkowitz, D., Shen,  
990 Y.A.A., Kay, J.N., Aurrand-Lions, M., Lyons, D.A., Peles, E., et al. (2016).  
991 Somatodendritic Expression of JAM2 Inhibits Oligodendrocyte Myelination. *Neuron* 91.  
992 Saab, A.S., Tzvetavona, I.D., Trevisiol, A., Baltan, S., Dibaj, P., Kusch, K., Möbius, W.,  
993 Goetze, B., Jahn, H.M., Huang, W., et al. (2016). Oligodendroglial NMDA Receptors  
994 Regulate Glucose Import and Axonal Energy Metabolism. *Neuron* 91.  
995 Salazar, A.M., Resnik-Docampo, M., Ulgherait, M., Clark, R.I., Shirasu-Hiza, M., Jones,  
996 D.L., and Walker, D.W. (2018). Intestinal Snakeskin Limits Microbial Dysbiosis during  
997 Aging and Promotes Longevity. *IScience* 9.

998 Satoh, T., Moroi, R., Aritake, K., Urade, Y., Kanai, Y., Sumi, K., Yokozeki, H., Hirai, H.,  
999 Nagata, K., Hara, T., et al. (2006). Prostaglandin D<sub>2</sub> Plays an Essential Role in  
1000 Chronic Allergic Inflammation of the Skin via CRTH2 Receptor . *J. Immunol.* *177*.  
1001 Scher, J.U., and Pillinger, M.H. (2005). 15d-PGJ<sub>2</sub>: The anti-inflammatory prostaglandin?  
1002 *Clin. Immunol.* *114*.  
1003 Schirmer, L., Möbius, W., Zhao, C., Cruz-Herranz, A., Ben Haim, L., Cordano, C.,  
1004 Shiow, L.R., Kelley, K.W., Sadowski, B., Timmons, G., et al. (2018). Oligodendrocyte-  
1005 encoded kir4.1 function is required for axonal integrity. *Elife* *7*.  
1006 Sherafat, A., Pfeiffer, F., Reiss, A.M., Wood, W.M., and Nishiyama, A. (2021). Microglial  
1007 neuropilin-1 promotes oligodendrocyte expansion during development and  
1008 remyelination by trans-activating platelet-derived growth factor receptor. *Nat. Commun.*  
1009 *12*.  
1010 Simons, M., and Nave, K.A. (2016). Oligodendrocytes: Myelination and axonal support.  
1011 *Cold Spring Harb. Perspect. Biol.* *8*.  
1012 Slezak, M., Grosche, A., Niemiec, A., Tanimoto, N., Pannicke, T., Münch, T.A., Crocker,  
1013 B., Isope, P., Härtig, W., Beck, S.C., et al. (2012). Relevance of Exocytotic Glutamate  
1014 Release from Retinal Glia. *Neuron* *74*.  
1015 Sloane, J.A., and Vartanian, T.K. (2007). Myosin Va controls oligodendrocyte  
1016 morphogenesis and myelination. *J. Neurosci.* *27*.  
1017 Snaidero, N., Velte, C., Myllykoski, M., Raasakka, A., Ignatev, A., Werner, H.B., Erwig,  
1018 M.S., Möbius, W., Kursula, P., Nave, K.A., et al. (2017). Antagonistic Functions of MBP  
1019 and CNP Establish Cytosolic Channels in CNS Myelin. *Cell Rep.* *18*.  
1020 Somm, E., Bonnet, N., Martinez, A., Marks, P.M.H., Cadd, V.A., Elliott, M., Toulotte, A.,

- 1021 Ferrari, S.L., Rizzoli, R., Hüppi, P.S., et al. (2012). A botulinum toxin - Derived targeted  
1022 secretion inhibitor downregulates the GH/IGF1 axis. *J. Clin. Invest.* 122.
- 1023 Stadelmann, C., Timmler, S., Barrantes-Freer, A., and Simons, M. (2019). Myelin in the  
1024 central nervous system: Structure, function, and pathology. *Physiol. Rev.* 99.
- 1025 Sun, L.O., Mulinyawe, S.B., Collins, H.Y., Ibrahim, A., Li, Q., Simon, D.J., Tessier-  
1026 Lavigne, M., and Barres, B.A. (2018). Spatiotemporal Control of CNS Myelination by  
1027 Oligodendrocyte Programmed Cell Death through the TFEB-PUMA Axis. *Cell* 175.
- 1028 Trimarco, A., Forese, M.G., Alfieri, V., Lucente, A., Brambilla, P., Dina, G., Pieragostino,  
1029 D., Sacchetta, P., Urade, Y., Boizet-Bonhoure, B., et al. (2014). Prostaglandin D2  
1030 synthase/GPR44: A signaling axis in PNS myelination. *Nat. Neurosci.* 17.
- 1031 Urade, Y., and Hayaishi, O. (2000). Biochemical, structural, genetic, physiological, and  
1032 pathophysiological features of lipocalin-type prostaglandin D synthase. *Biochim.*  
1033 *Biophys. Acta - Protein Struct. Mol. Enzymol.* 1482.
- 1034 Urade, Y., and Hayaishi, O. (2011). Prostaglandin D2 and sleep/wake regulation. *Sleep*  
1035 *Med. Rev.* 15.
- 1036 Urade, Y., Kitahama, K., Ohishi, H., Kaneko, T., Mizuno, N., and Hayaishi, O. (1993).  
1037 Dominant expression of mRNA for prostaglandin D synthase in leptomeninges, choroid  
1038 plexus, and oligodendrocytes of the adult rat brain. *Proc. Natl. Acad. Sci. U. S. A.* 90.
- 1039 Wake, H., Lee, P.R., and Fields, R.D. (2011). Control of local protein synthesis and  
1040 initial events in myelination by action potentials. *Science* (80-. ). 333.
- 1041 Wang, H., Moyano, A.L., Ma, Z., Deng, Y., Lin, Y., Zhao, C., Zhang, L., Jiang, M., He,  
1042 X., Ma, Z., et al. (2017). miR-219 Cooperates with miR-338 in Myelination and  
1043 Promotes Myelin Repair in the CNS. *Dev. Cell* 40.



- 1044 Wang, J., He, X., Meng, H., Li, Y., Dmitriev, P., Tian, F., Page, J.C., Lu, Q.R., and He,  
1045 Z. (2020). Robust Myelination of Regenerated Axons Induced by Combined  
1046 Manipulations of GPR17 and Microglia. *Neuron* 108.
- 1047 Xu, H., Dzhashiashvili, Y., Shah, A., Kunjamma, R.B., Weng, Y. Ian, Elbaz, B., Fei, Q.,  
1048 Jones, J.S., Li, Y.I., Zhuang, X., et al. (2020). m6A mRNA Methylation Is Essential for  
1049 Oligodendrocyte Maturation and CNS Myelination. *Neuron* 105.
- 1050 Yamamoto, H., Ida, T., Tsutsuki, H., Mori, M., Matsumoto, T., Kohda, T., Mukamoto, M.,  
1051 Goshima, N., Kozaki, S., and Ihara, H. (2012). Specificity of botulinum protease for  
1052 human VAMP family proteins. *Microbiol. Immunol.* 56.
- 1053 Zhang, Y., Chen, K., Sloan, S.A., Bennett, M.L., Scholze, A.R., O’Keeffe, S., Phatnani,  
1054 H.P., Guarnieri, P., Caneda, C., Ruderisch, N., et al. (2014). An RNA-Sequencing  
1055 Transcriptome and Splicing Database of Glia, Neurons, and Vascular Cells of the  
1056 Cerebral Cortex. *J. Neurosci.* 34, 11929–11947.
- 1057 Zhang, Y., Sloan, S.A., Clarke, L.E., Caneda, C., Plaza, C.A., Blumenthal, P.D., Vogel,  
1058 H., Steinberg, G.K., Edwards, M.S.B., Li, G., et al. (2016). Purification and  
1059 Characterization of Progenitor and Mature Human Astrocytes Reveals Transcriptional  
1060 and Functional Differences with Mouse. *Neuron* 89, 37–53.
- 1061 Zhao, C., Dong, C., Frah, M., Deng, Y., Marie, C., Zhang, F., Xu, L., Ma, Z., Dong, X.,  
1062 Lin, Y., et al. (2018). Dual Requirement of CHD8 for Chromatin Landscape  
1063 Establishment and Histone Methyltransferase Recruitment to Promote CNS Myelination  
1064 and Repair. *Dev. Cell* 45.
- 1065 Zuchero, J.B., Fu, M., Sloan, S.A., Ibrahim, A., Olson, A., Zaremba, A., Dugas, J.C.,  
1066 Wienbar, S., Caprariello, A.V., Kantor, C., et al. (2015). CNS Myelin Wrapping Is Driven

1067 by Actin Disassembly. Dev. Cell 34.

1068

## Supplementary Information

### Oligodendrocyte-lineage cell exocytosis and L-type prostaglandin D synthase promote oligodendrocyte development and myelination

#### Supplementary Figures

#### Figure 1- figure supplement 1

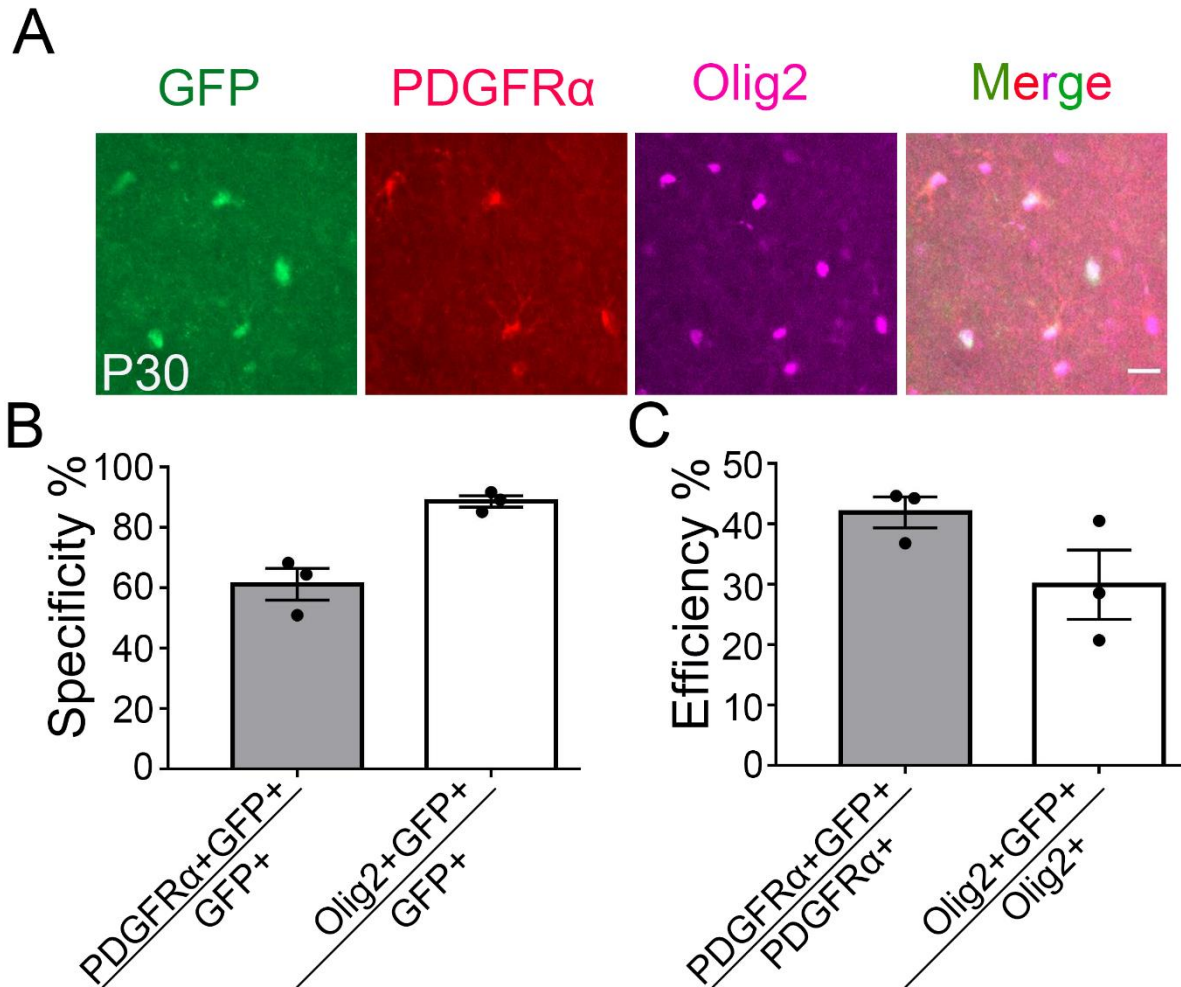

#### Figure 1-figure supplement 1. Specificity and efficiency of ibot expression in oligodendrocyte-lineage cells at P30

(A) Colocalization of ibot-GFP with PDGFR $\alpha$  and Olig2 in PDGFR $\alpha$ -CreER; ibot (PD:ibot) mice. Scale bar: 20  $\mu$ m.

(B) Specificity of ibot-GFP expression in oligodendrocyte-lineage cells at P30. N=3 mice per group.

(C) Efficiency of ibot-GFP expression in oligodendrocyte-lineage cells at P30. N=3 mice per group.

## Figure 6- figure supplement 1

### A

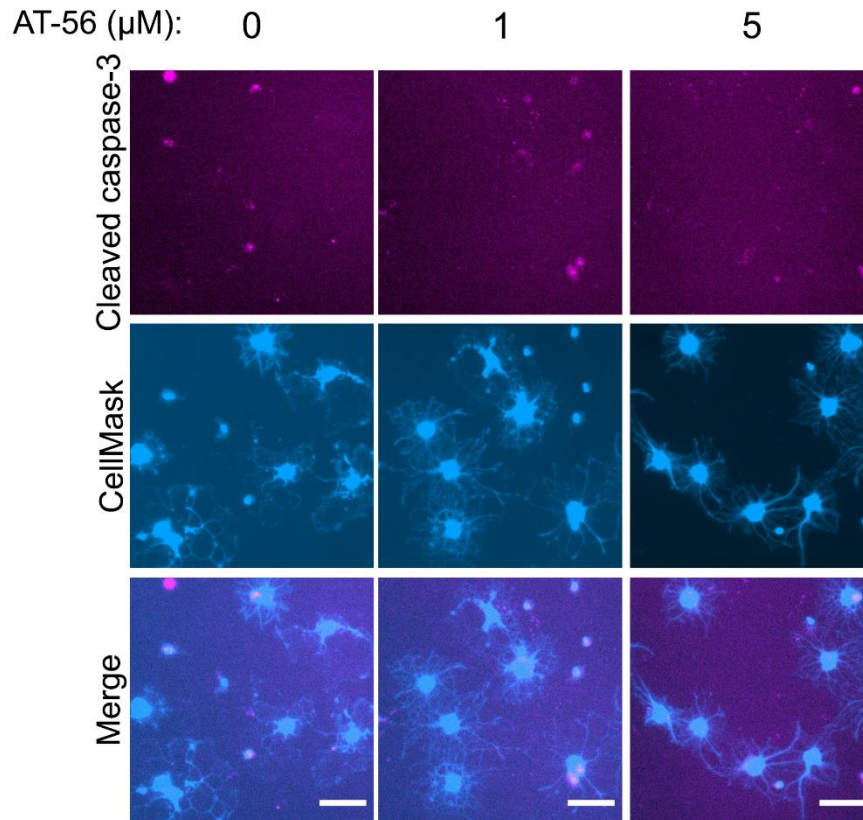

### B

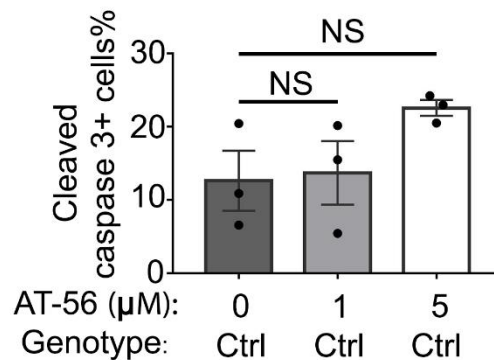

### Figure 6-figure supplement 1. No change in the percentage of apoptotic cells in AT-56 treatment

(A) Oligodendrocyte culture from wildtype mice after 7 days of differentiation in the presence and absence of the LPGDS inhibitor AT-56. Magenta: cleaved caspase-3. Blue: CellMask, which labels all cells. Scale bars: 40  $\mu\text{m}$ .

(B) Quantification of caspase3<sup>+</sup> cells. One-way ANOVA with Dunnett's test for multiple comparison correction. N=3 cultures from 3 mice per group.

## **Supplementary Tables**

### **Supplementary Table 1. Gene expression (RPKM) of OPCs, oligodendrocytes, microglia, and astrocytes from PD:ibot and littermate control mice at P17 determined by RNA-seq**

Reads per kilobase of transcripts per million mapped reads (RPKM) are shown.

### **Supplementary Table 2. Differentially expressed genes in OPCs, oligodendrocytes, microglia, and astrocytes from PD:ibot and littermate control mice at P17**

Genes with adjusted P-values <0.05 are shown. We used DESeq2 to determine differential gene expression.

### **Supplementary Table 3. Gene ontology terms associated with differentially expressed genes in OPCs, oligodendrocytes, microglia, and astrocytes from PD:ibot and littermate control mice at P17**

No gene ontology terms were significantly enriched in genes downregulated in OPCs, astrocytes, or upregulated in microglia in PD:ibot mice.
